# Supplementary material for: Coumarin derivatives from Ainsliaea fragrans and their anticoagulant activity
Source: PubMed Central journal article supplement (PMC4551958; doi:10.1038/srep13544), 2015-08-28

# Supporting Information

## Coumarin derivatives from *Ainsliaea fragrans* and their anticoagulant activity

Liang Lei<sup>1†</sup>, Yong-bo Xue<sup>2†</sup>, Zhong Liu<sup>1</sup>, Si-si Peng<sup>1</sup>, Yan He<sup>2</sup>, Yang Zhang<sup>2</sup>, Rong Fang<sup>1</sup>, Jian-ping Wang<sup>2</sup>, Zeng-wei Luo<sup>2</sup>, Guang-min Yao<sup>2</sup>, Jin-wen Zhang<sup>3</sup>, Geng Zhang<sup>4</sup>, Hong-ping Song<sup>1\*</sup> & Yong-hui Zhang<sup>2\*</sup>

<sup>1</sup> *Puai Hospital Affiliated to Tongji Medical College, Huazhong University of Science and Technology, Wuhan 430030, People's Republic of China*

<sup>2</sup> *Hubei Key Laboratory of Natural Medicinal Chemistry and Resource Evaluation, School of Pharmacy, Tongji Medical College, Huazhong University of Science and Technology, Wuhan 430030, People's Republic of China*

<sup>3</sup> *Tongji Hospital Affiliated to Tongji Medical College, Huazhong University of Science and Technology, Wuhan 430030, People's Republic of China*

<sup>4</sup> *Department of Pharmacy, Wuhan First Hospital, Wuhan 430022, Hubei, People's Republic of China*

Corresponding authors.

Tel./fax: +86 027 83692311(Y.H. Zhang),+86 027-68835014 (H. P. Song);

Email: zhangyh@mails.tjmu.edu.cn (Y. H. Zhang), songhongping@126.com (H. P. Song)

† These authors contributed equally.

# Content

|                                                                                                             |    |
|-------------------------------------------------------------------------------------------------------------|----|
| Figure S1. HRESIMS of compound 1 .....                                                                      | 3  |
| Figure S2. The UV spectrum of compound 1 .....                                                              | 3  |
| Figure S3. IR spectrum of Compound 1 .....                                                                  | 4  |
| Figure S4. <sup>1</sup> H-NMR of Compound 1 in Pyridine- <i>d</i> <sub>5</sub> , 400 MHz.....               | 4  |
| Figure S5. <sup>13</sup> C-NMR and DEPT NMR of Compound 1 in Pyridine- <i>d</i> <sub>5</sub> , 100 MHz..... | 5  |
| Figure S6. HSQC of Compound 1 in Pyridine- <i>d</i> <sub>5</sub> .....                                      | 5  |
| Figure S7. HMBC of Compound 1 in Pyridine- <i>d</i> <sub>5</sub> .....                                      | 6  |
| Figure S8. <sup>1</sup> H- <sup>1</sup> H COSY of Compound 1 in Pyridine- <i>d</i> <sub>5</sub> .....       | 6  |
| Figure S9. NOESY spectrum of Compound 1 in Pyridine- <i>d</i> <sub>5</sub> .....                            | 7  |
| Figure S11. ORTEP View of Compound 1. ....                                                                  | 8  |
| Figure S12 Enantioseparation of Compound 1 by HPLC.....                                                     | 8  |
| Figure S13 The crystal packing of Compound 1a .....                                                         | 9  |
| Figure S14 ORTEP View of Compound 1a. ....                                                                  | 9  |
| Figure S15 HRESIMS of compound 2 .....                                                                      | 10 |
| Figure S16 The UV spectrum of compound 2 .....                                                              | 10 |
| Figure S17 The IR spectrum of compound 2.....                                                               | 11 |
| Figure S18 <sup>1</sup> H-NMR of Compound 2 in CD <sub>3</sub> Cl, 400 MHz .....                            | 11 |
| Figure S19 <sup>13</sup> C-NMR and DEPT of Compound 2 in CD <sub>3</sub> Cl, 100 MHz.....                   | 12 |
| Figure S20 HSQC of Compound 2 in CD <sub>3</sub> Cl. ....                                                   | 12 |
| Figure S21 HMBC of Compound 2 in CD <sub>3</sub> Cl. ....                                                   | 13 |
| Figure S22 <sup>1</sup> H- <sup>1</sup> H COSY of Compound 2 in CD <sub>3</sub> Cl.....                     | 13 |
| Figure S23 NOE of Compound 2 in CD <sub>3</sub> Cl.....                                                     | 14 |
| Figure S24 The crystal packing of Compound 2 .....                                                          | 14 |
| Figure S25 Enantioseparation of Compound 2 by HPLC.....                                                     | 15 |
| Figure S26 The crystal packing of Compound 2a .....                                                         | 15 |
| Figure S27 ORTEP View of Compound 2a .....                                                                  | 15 |
| Figure S28 HRESIMS of compound 3 .....                                                                      | 16 |
| Figure S29 IR spectrum of Compound 3 .....                                                                  | 16 |
| Figure S30 UV spectrum of Compound 3 .....                                                                  | 17 |
| Figure S31 <sup>1</sup> H-NMR of Compound 3 in CD <sub>3</sub> OD, 400 MHz .....                            | 17 |
| Figure S32 <sup>13</sup> C-NMR and DEPT of Compound 3 in CD <sub>3</sub> OD, 100 MHz.....                   | 18 |
| Figure S33 HSQC of Compound 3 in CD <sub>3</sub> OD. ....                                                   | 18 |
| Figure S34 HMBC of Compound 3 in CD <sub>3</sub> OD. ....                                                   | 19 |
| Figure S35 <sup>1</sup> H- <sup>1</sup> H COSY of Compound 3 in CD <sub>3</sub> OD.....                     | 19 |
| Figure S36 The NOE of Compound 3 in CD <sub>3</sub> OD.....                                                 | 20 |
| Figure S37 The crystal packing of Compound 3 .....                                                          | 20 |
| Figure S38 <sup>1</sup> H-NMR of Compound 4 in CD <sub>3</sub> OD, 400 MHz .....                            | 21 |
| Figure S39 <sup>13</sup> C-NMR and DEPT of Compound 4 in CD <sub>3</sub> OD, 100 MHz.....                   | 21 |
| Figure S40 ORTEP View and crystal packing of Compound 4 .....                                               | 22 |
| Table 1. Crystal data and structure refinement for Compound 4 .....                                         | 23 |
| Figure S41. <sup>1</sup> H-NMR of Compound 5 in CD <sub>3</sub> Cl, 400 MHz .....                           | 23 |
| Figure S42. <sup>13</sup> C-NMR of Compound 5 in CD <sub>3</sub> Cl, 100 MHz .....                          | 24 |
| Figure S43 ORTEP View and crystal packing of Compound 5 .....                                               | 24 |
| Table 2. Crystal data and structure refinement for Compound 5 .....                                         | 25 |
| Figure S44. <sup>1</sup> H-NMR of Compound 6 in CD <sub>3</sub> Cl, 400 MHz .....                           | 26 |
| Figure S45. <sup>13</sup> C-NMR of Compound 6 in CD <sub>3</sub> Cl, 100 MHz .....                          | 26 |
| Check CIF of compound 1.....                                                                                | 27 |
| Check CIF of compound 1a.....                                                                               | 31 |
| Check CIF of compound 2.....                                                                                | 35 |
| Check CIF of compound 2a.....                                                                               | 38 |
| Check CIF of compound 3.....                                                                                | 41 |
| Check CIF of compound 4.....                                                                                | 45 |
| Check CIF of compound 5.....                                                                                | 49 |

**Figure S1.** HRESIMS of compound **1**

LL1-29-6 #25 RT: 0.35 AV: 1 NL: 3.59E7  
T: FTMS + p ESI Full ms [50.00-1500.00]

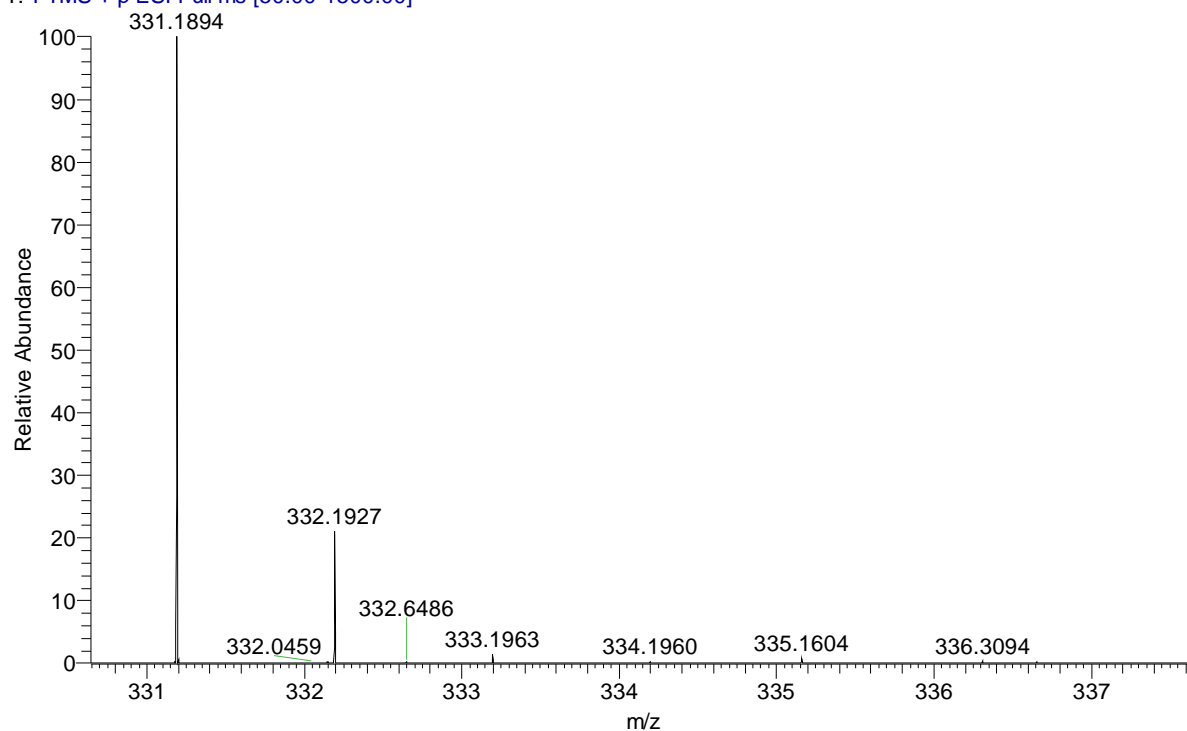

**Figure S2.** The UV spectrum of compound **1**

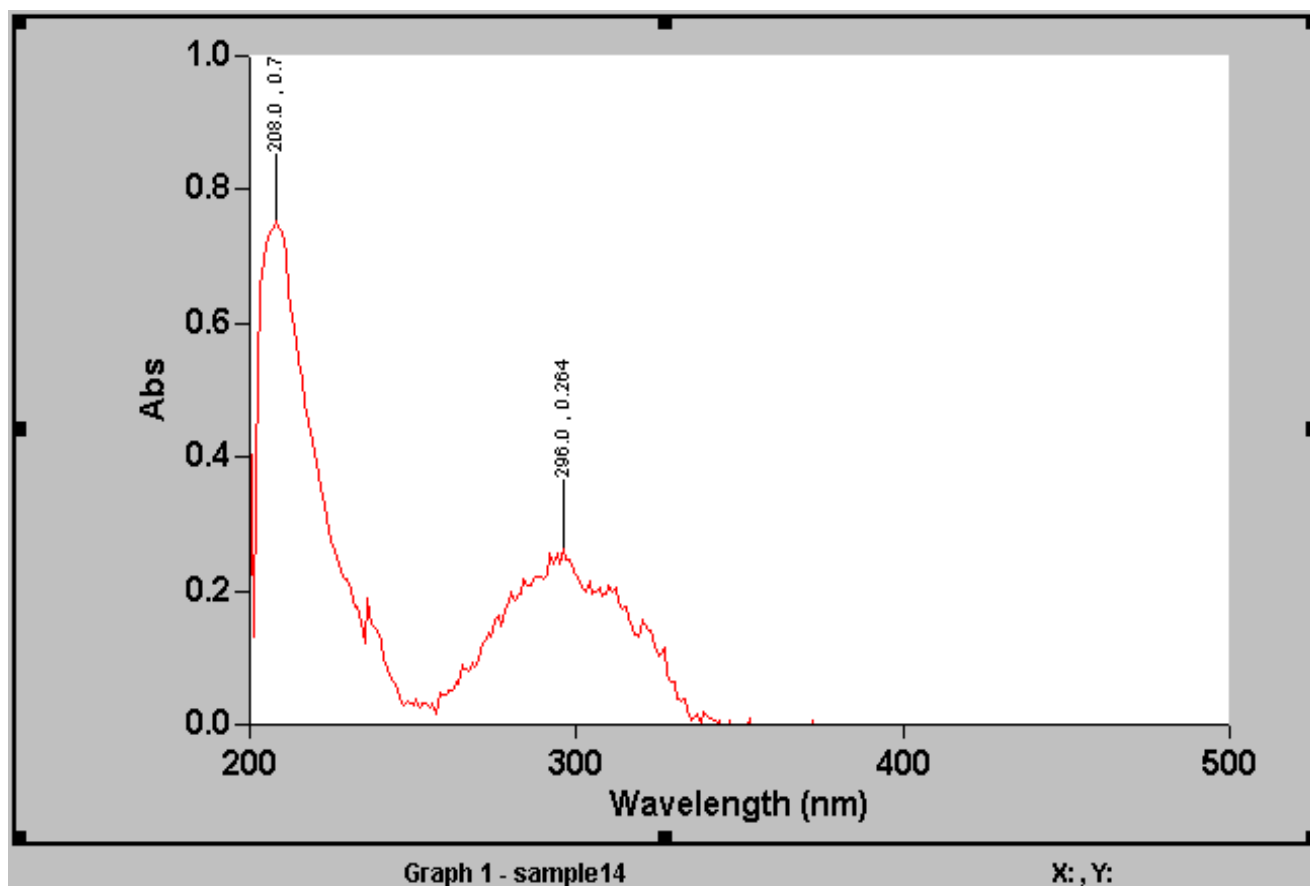

Graph 1 - sample14

X: , Y:

**Figure S3.** IR spectrum of Compound **1**

E:\同济医学院\姚广民\20140314\LL-C2.0

仪器型号: Bruker Vertex 70

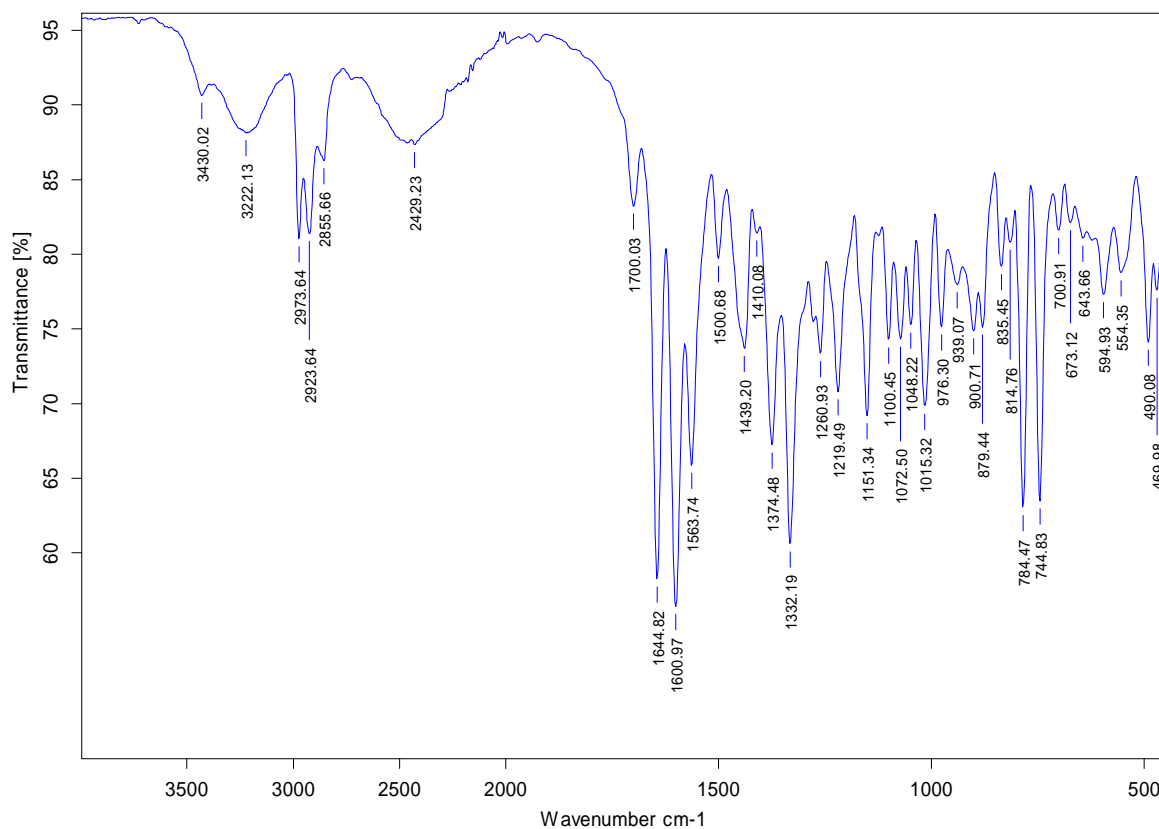

**Figure S4.** <sup>1</sup>H-NMR of Compound **1** in Pyridine-*d*<sub>5</sub>, 400 MHz

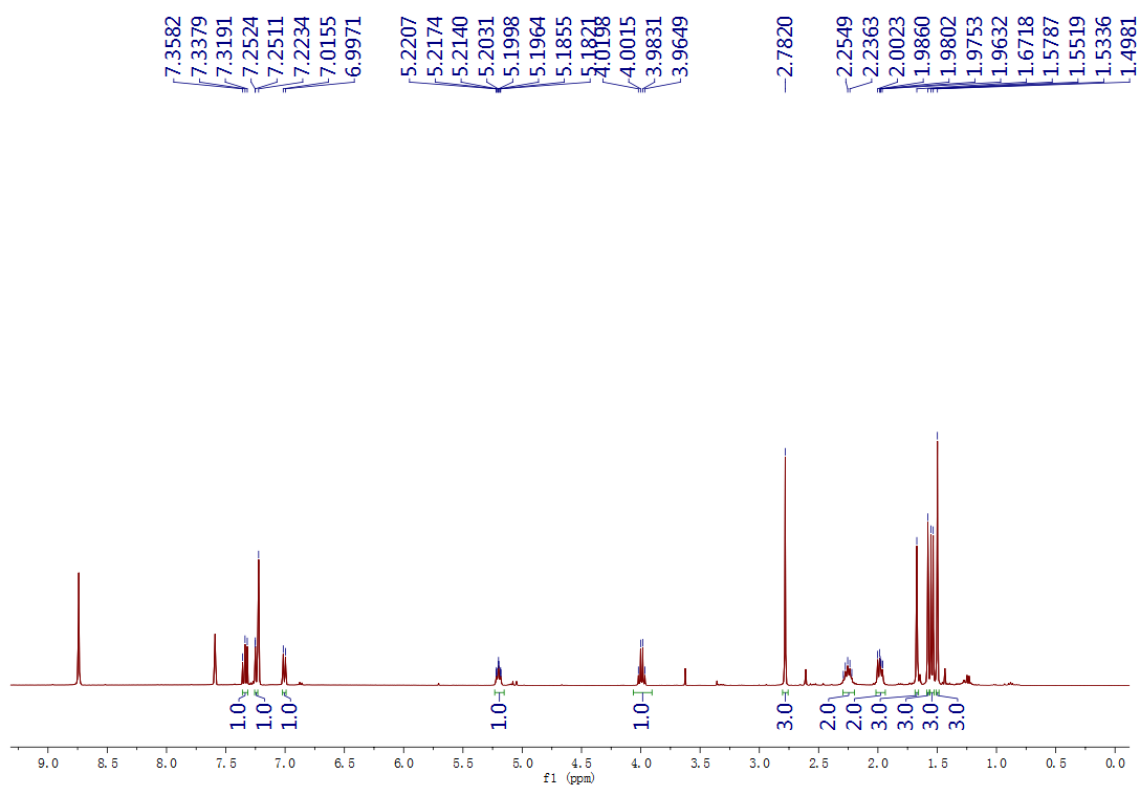

**Figure S5.**  $^{13}\text{C}$ -NMR and DEPT NMR of Compound **1** in Pyridine- $d_5$ , 100 MHz

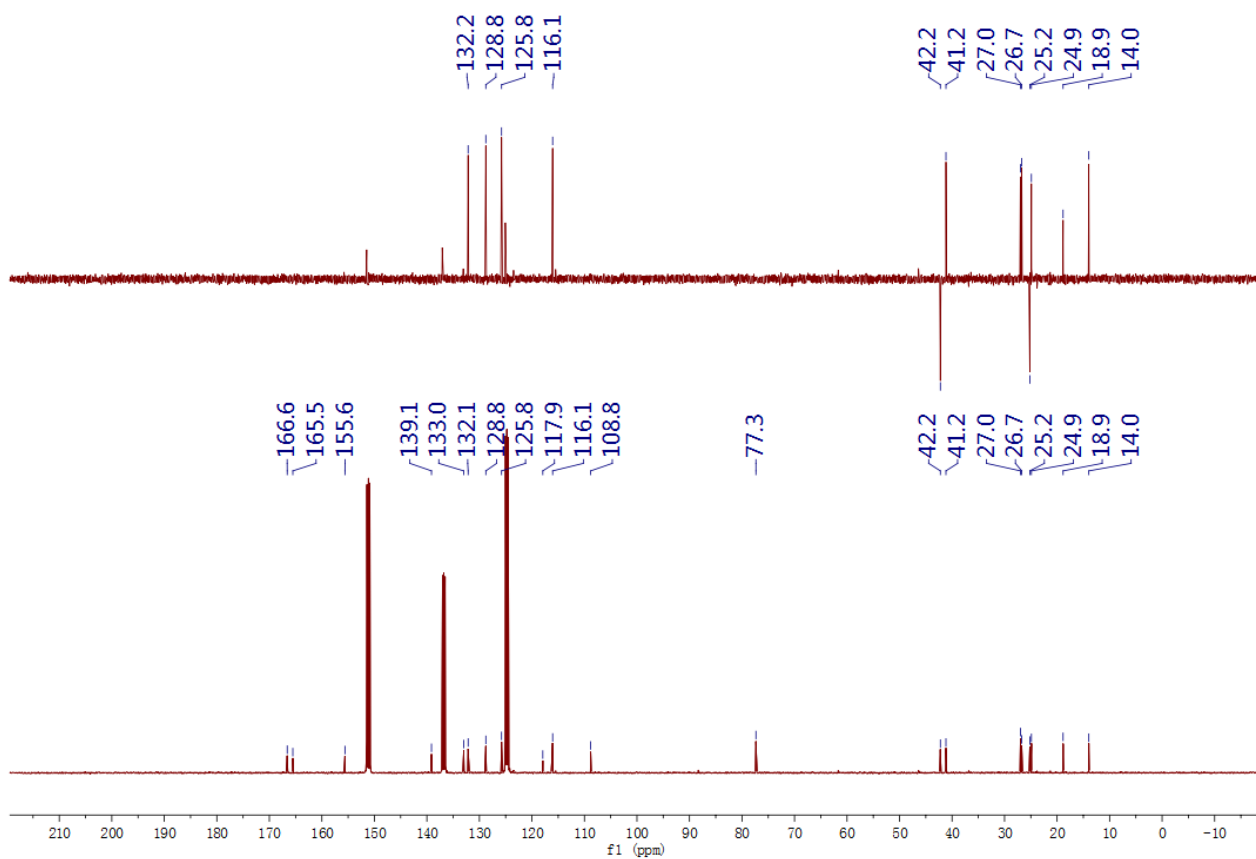

**Figure S6.** HSQC of Compound **1** in Pyridine- $d_5$

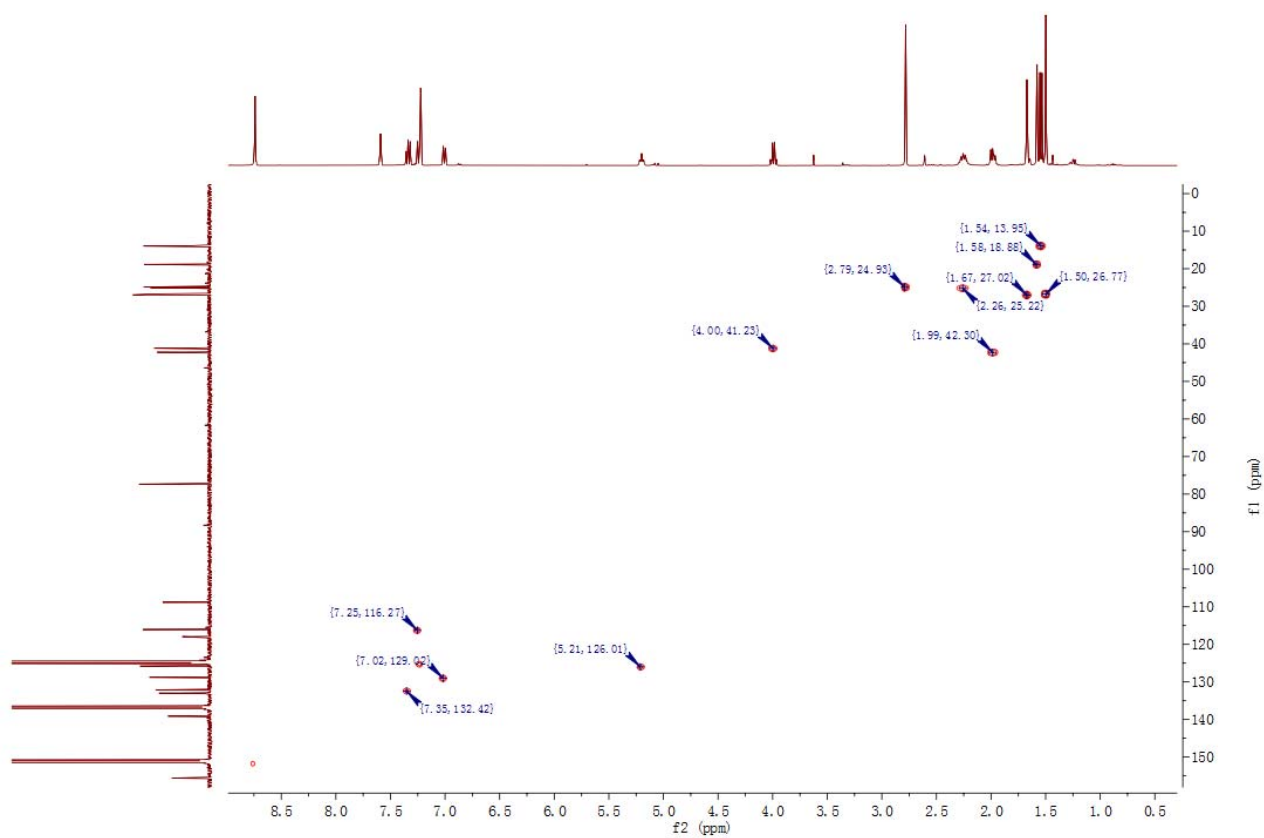

**Figure S7.** HMBC of Compound **1** in Pyridine-*d*<sub>5</sub>

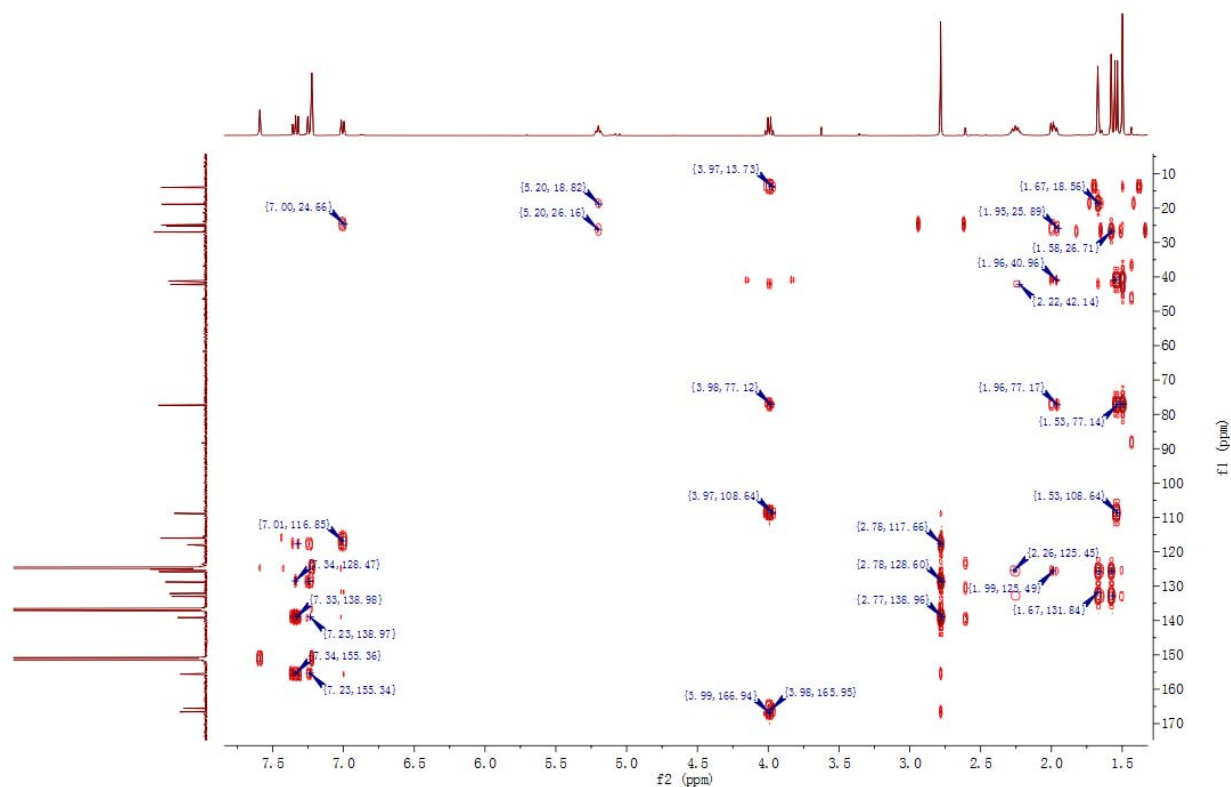

**Figure S8.** <sup>1</sup>H-<sup>1</sup>H COSY of Compound **1** in Pyridine-*d*<sub>5</sub>

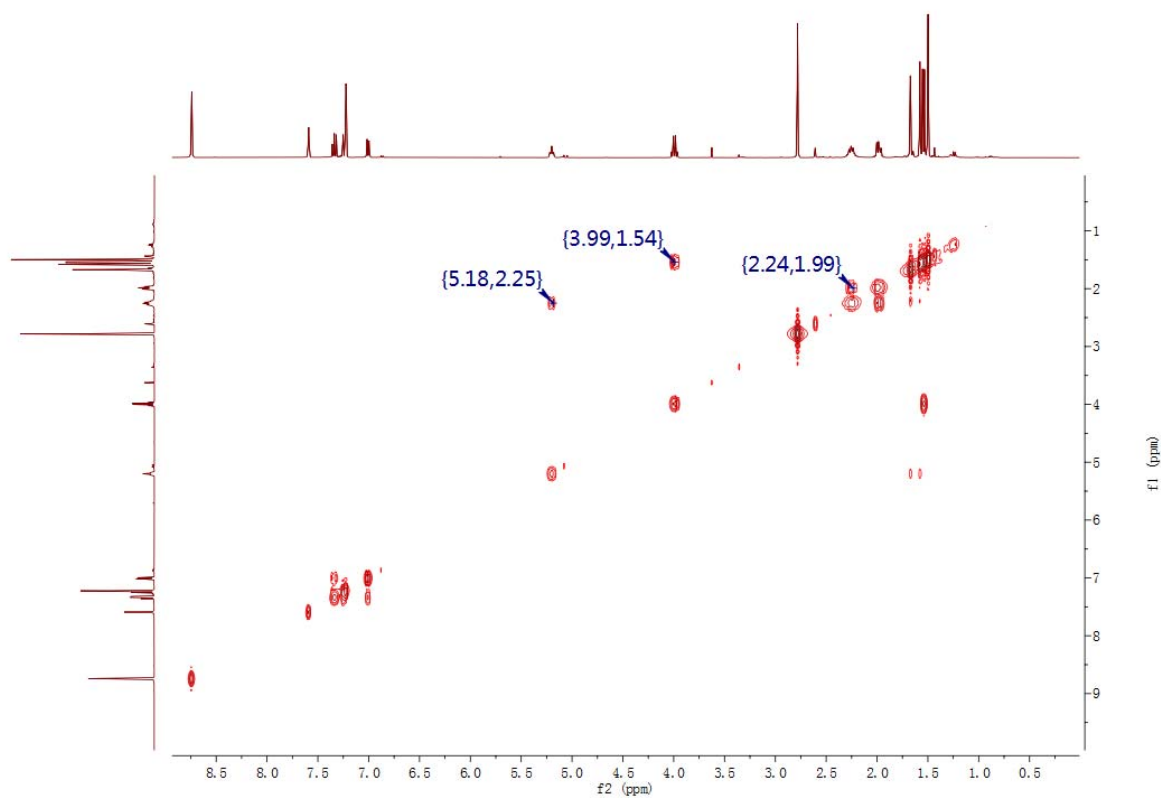

**Figure S9.** NOESY spectrum of Compound **1** in Pyridine-*d*<sub>5</sub>

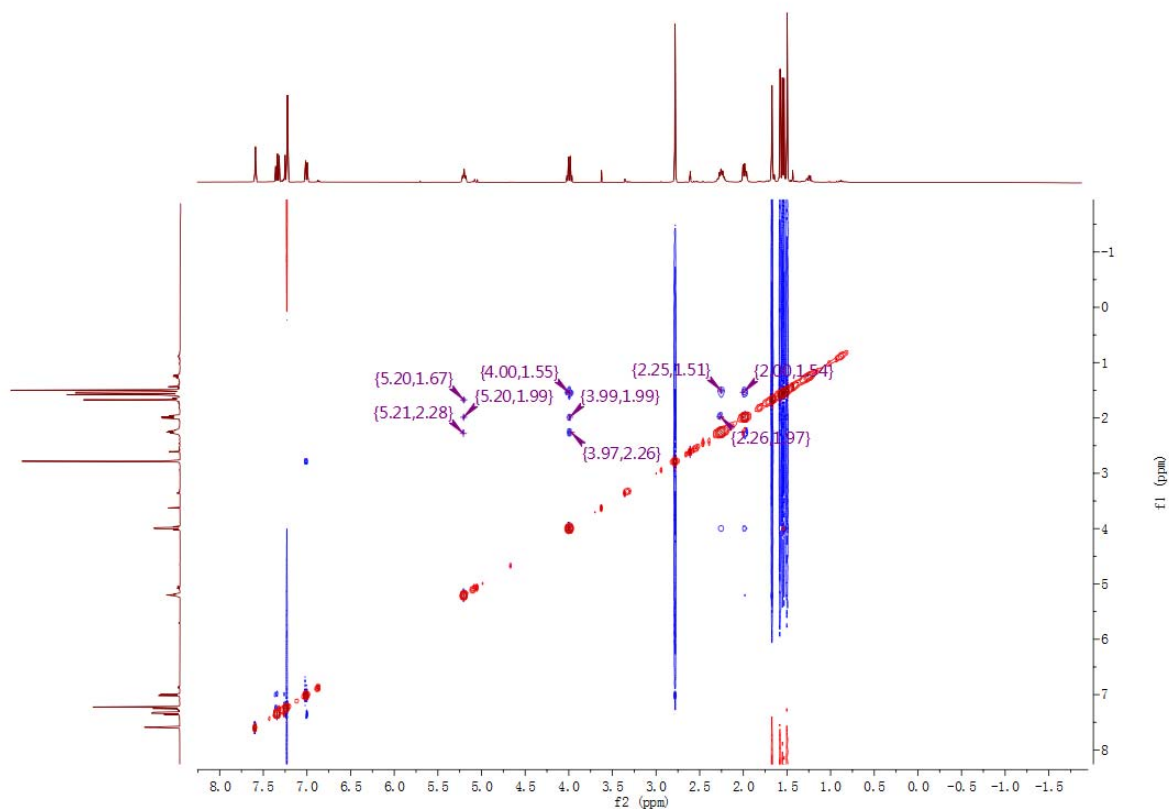

**Figure S10** <sup>1</sup>H-<sup>1</sup>H COSY and Key HMBC correlations of compound **1**

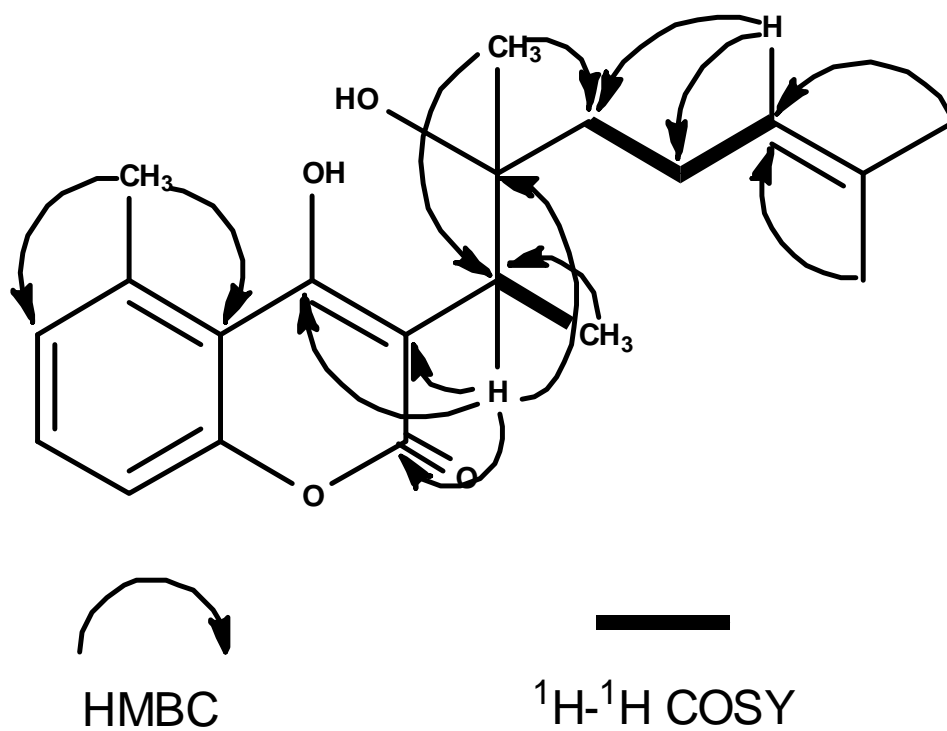

Figure S11. ORTEP View of Compound 1.

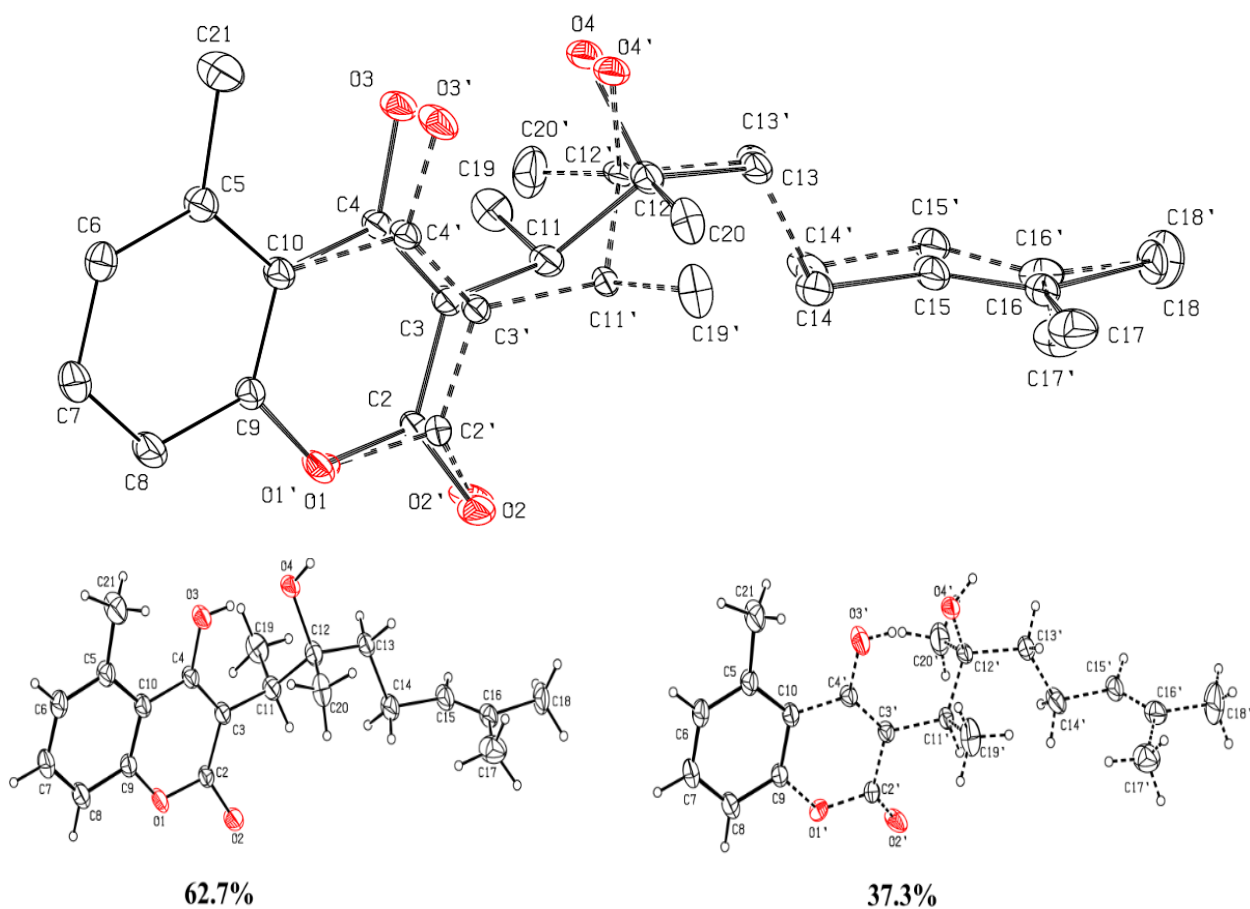

Figure S12 Enantioseparation of Compound 1 by HPLC.

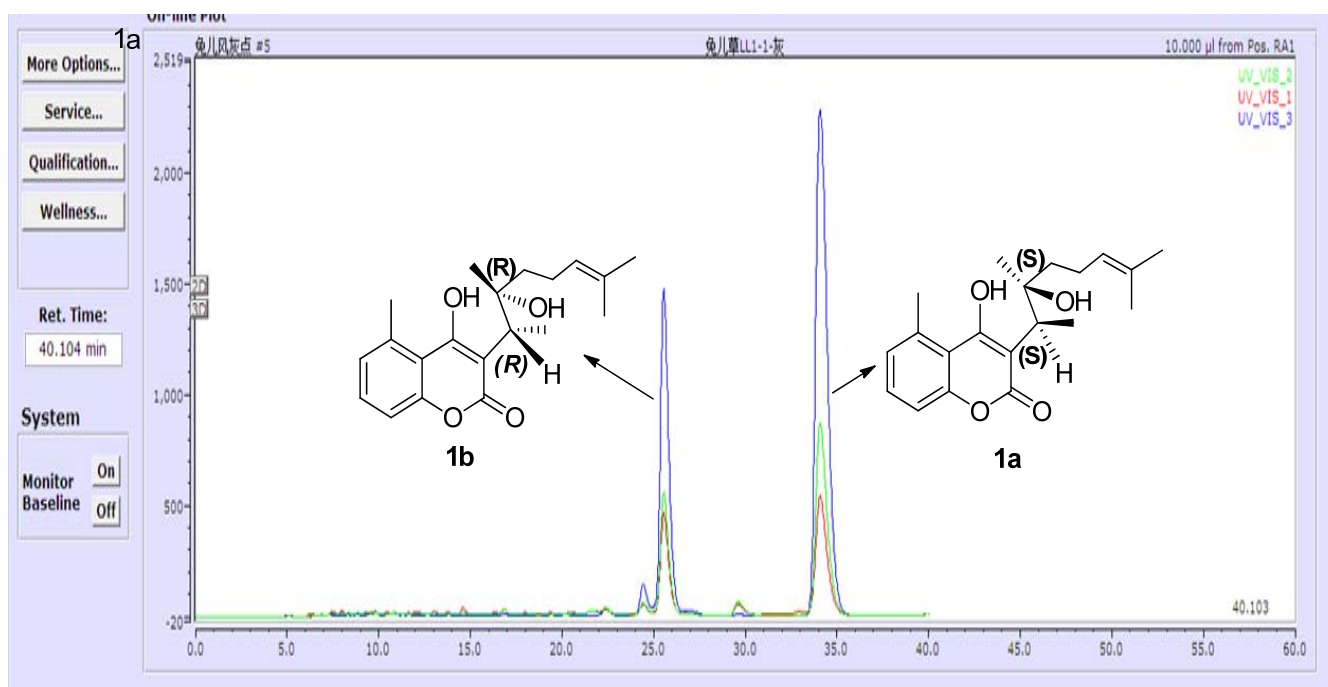

three-wavelength UV detector, the blue curve was at 230nm, green curve was at 210nm, the red curve was at 254nm.



**Figure S13** The crystal packing of Compound **1a**

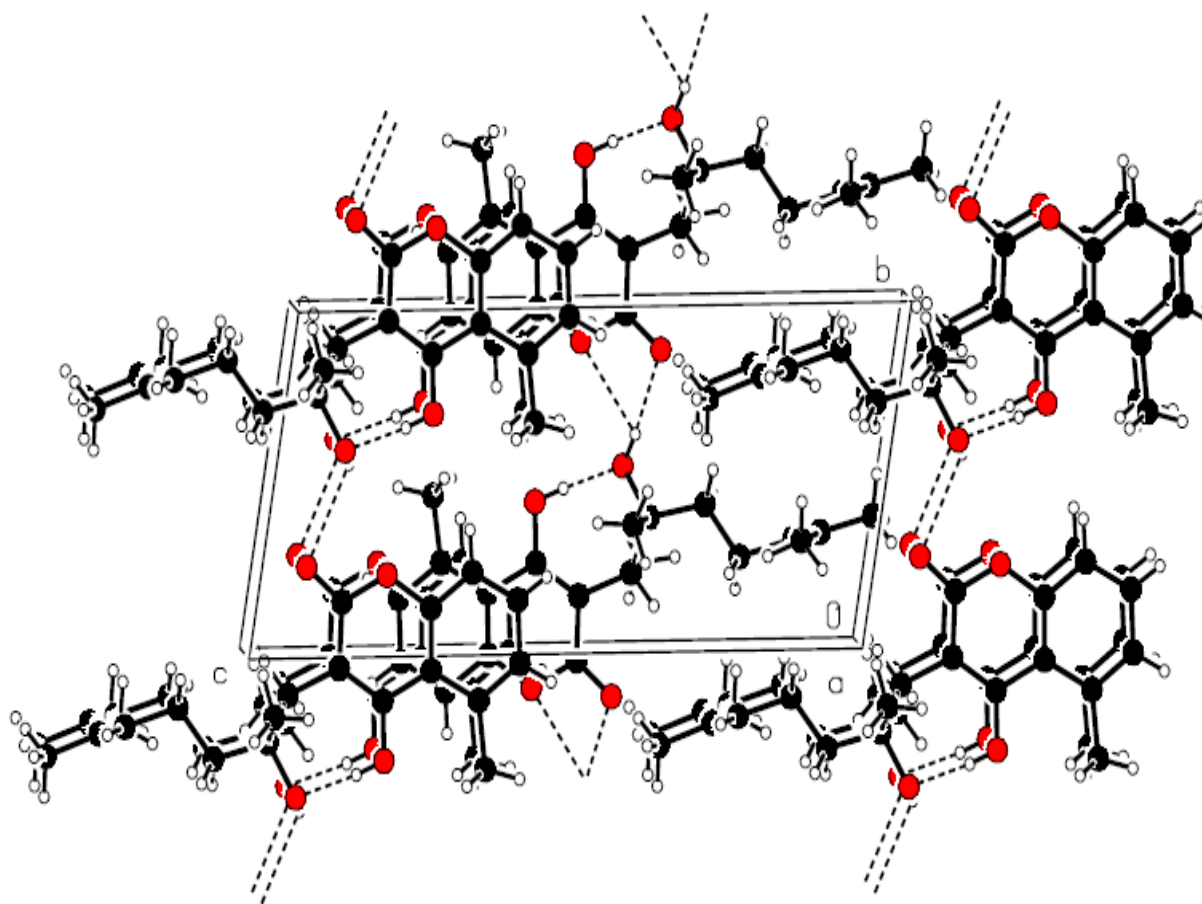

**Figure S14** ORTEP View of Compound **1a**.

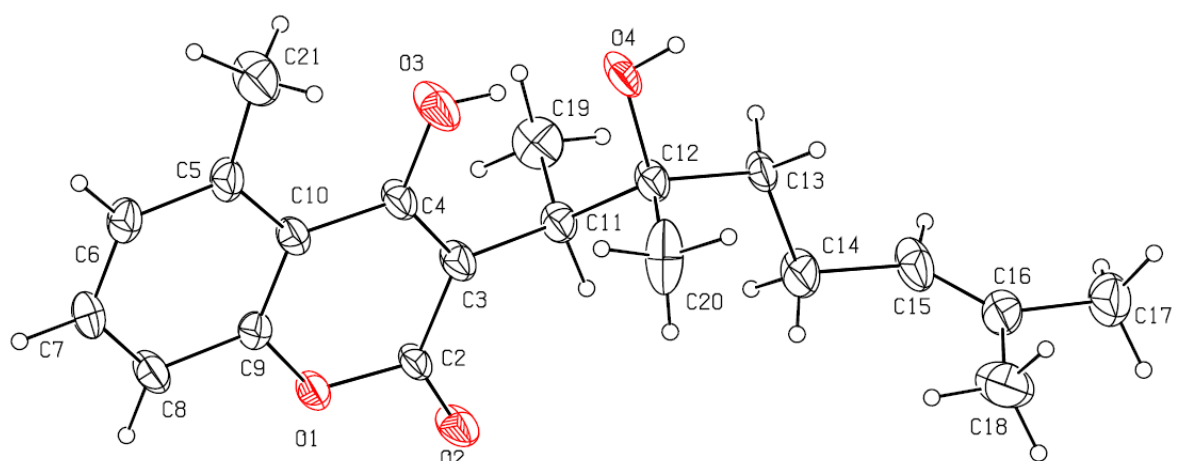

**Figure S15** HRESIMS of compound **2**

LL1-33-1 #25 RT: 0.35 AV: 1 NL: 1.26E8  
T: FTMS + p ESI Full ms [50.00-1500.00]

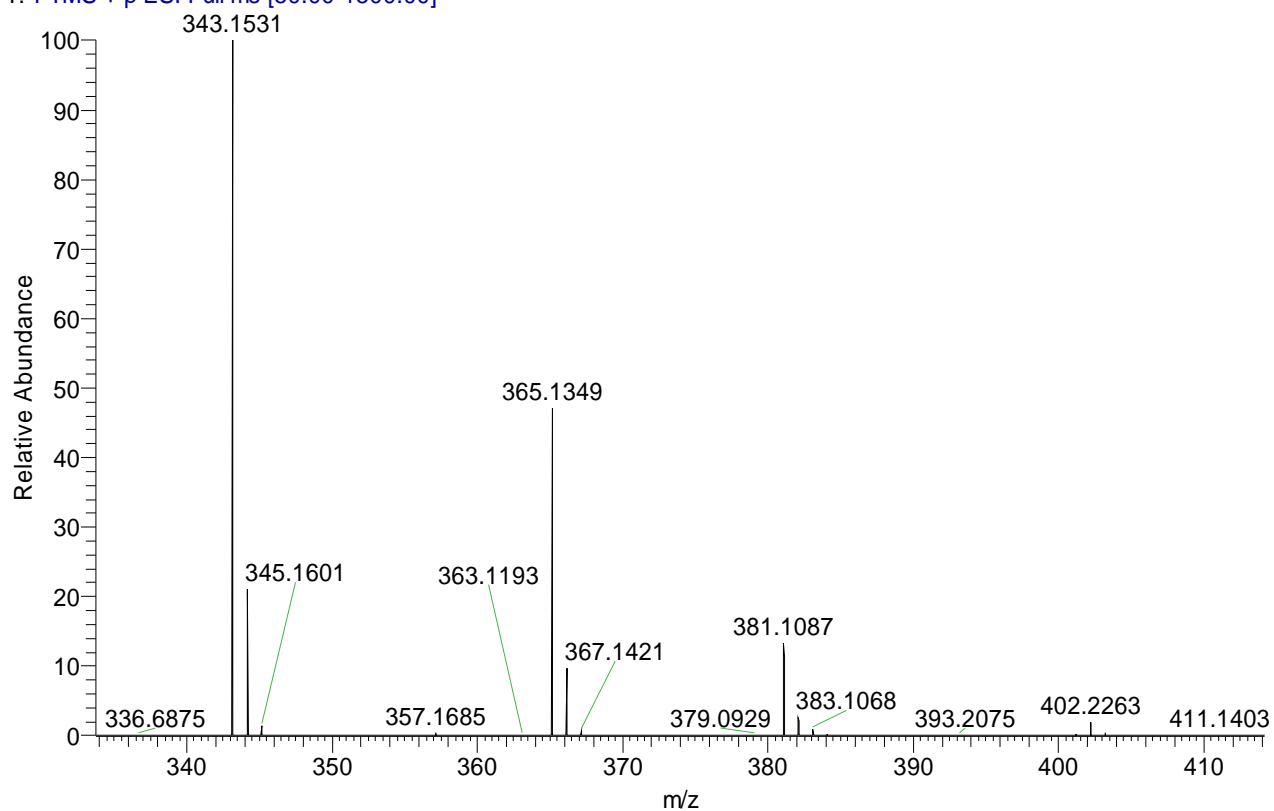

**Figure S16** The UV spectrum of compound **2**

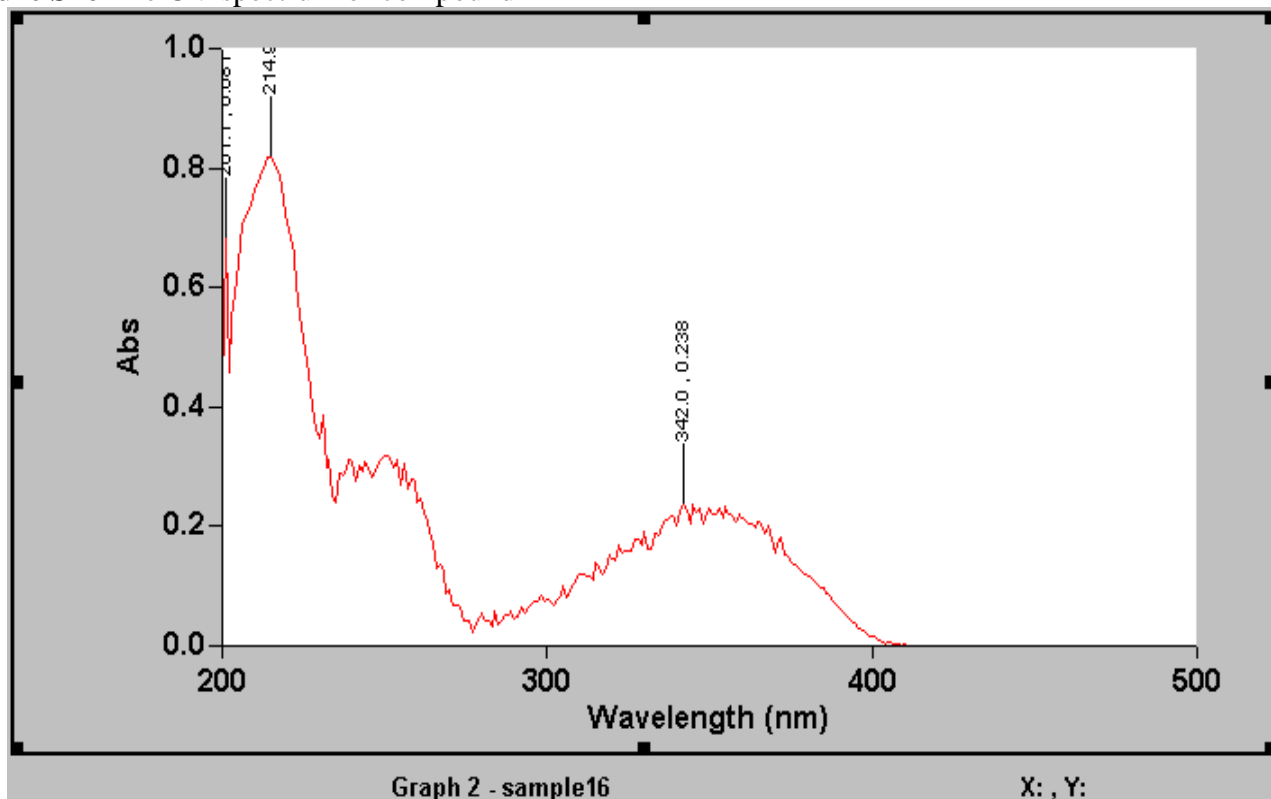

Graph 2 - sample16

X: , Y:

**Figure S17** The IR spectrum of compound **2**

E:\同济医学院\姚广民\20140314\LL-C3.0

仪器型号: Bruker Vertex 70

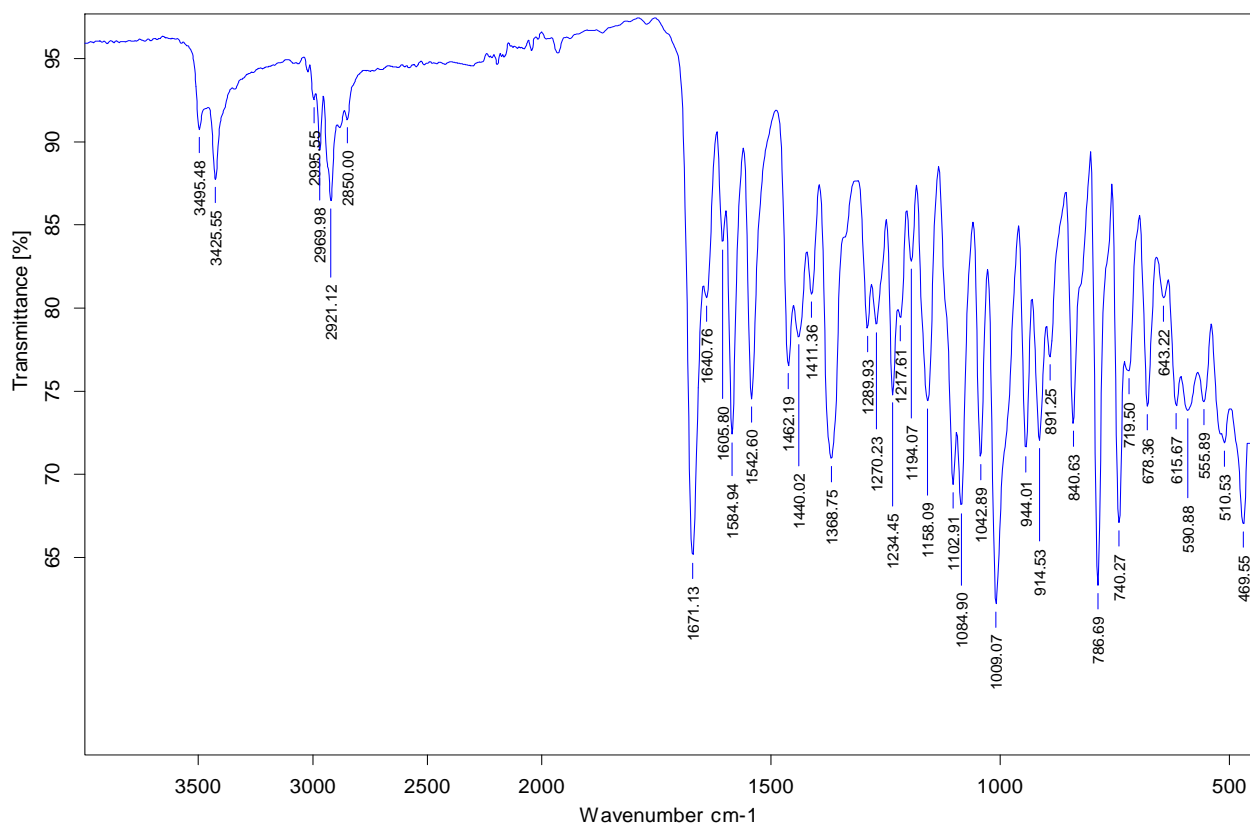

**Figure S18** <sup>1</sup>H-NMR of Compound **2** in CD<sub>3</sub>Cl, 400 MHz

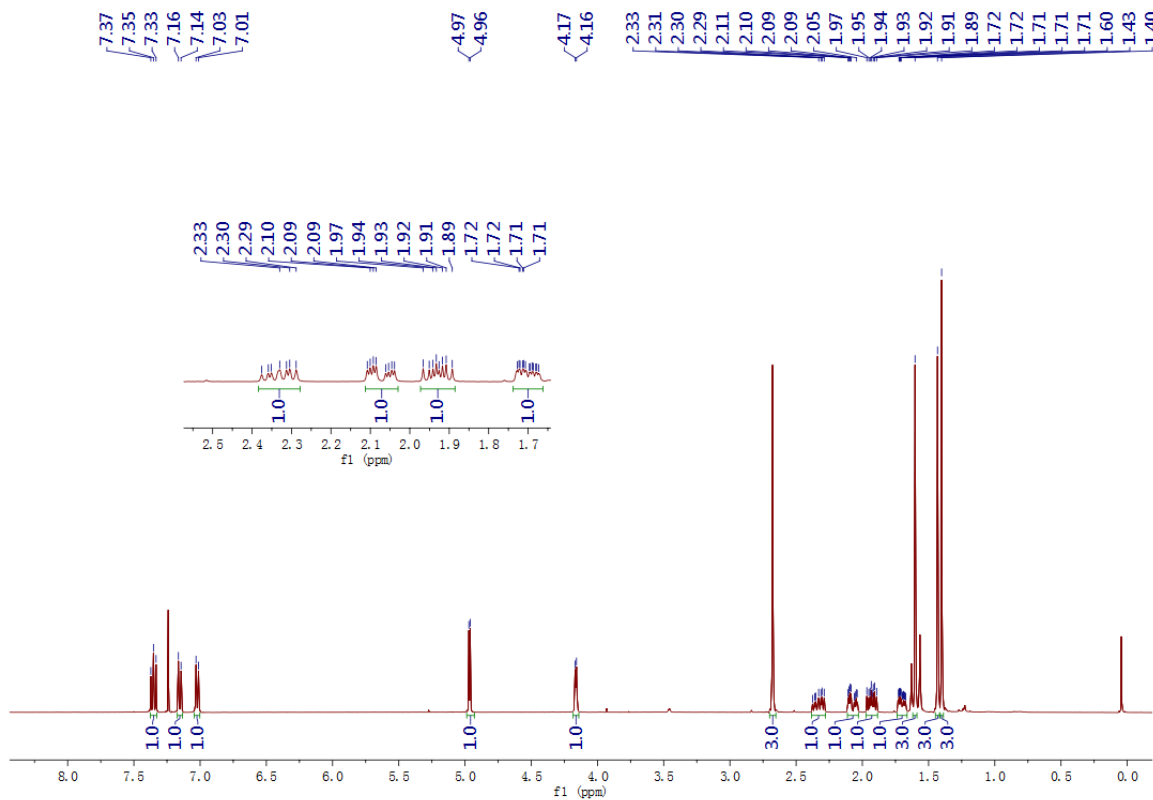

Figure S19  $^{13}\text{C}$ -NMR and DEPT of Compound 2 in  $\text{CD}_3\text{Cl}$ , 100 MHz

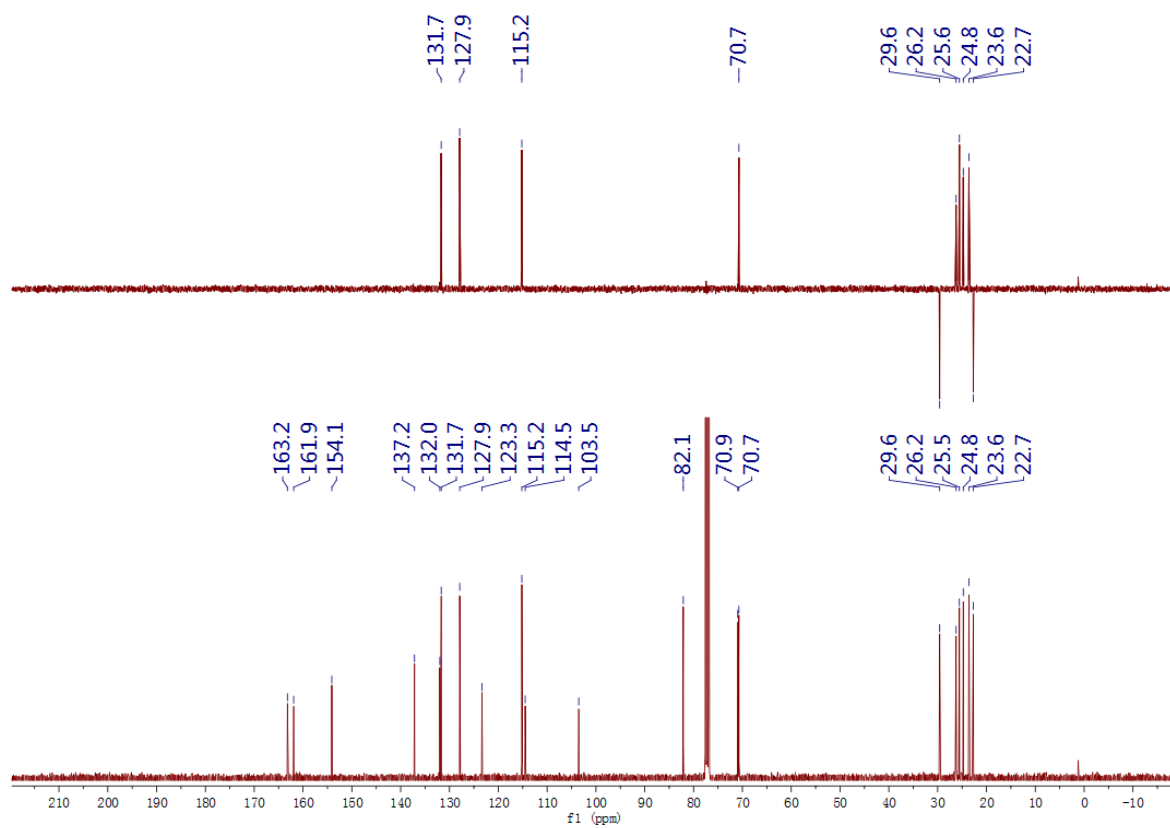

Figure S20 HSQC of Compound 2 in  $\text{CD}_3\text{Cl}$ .

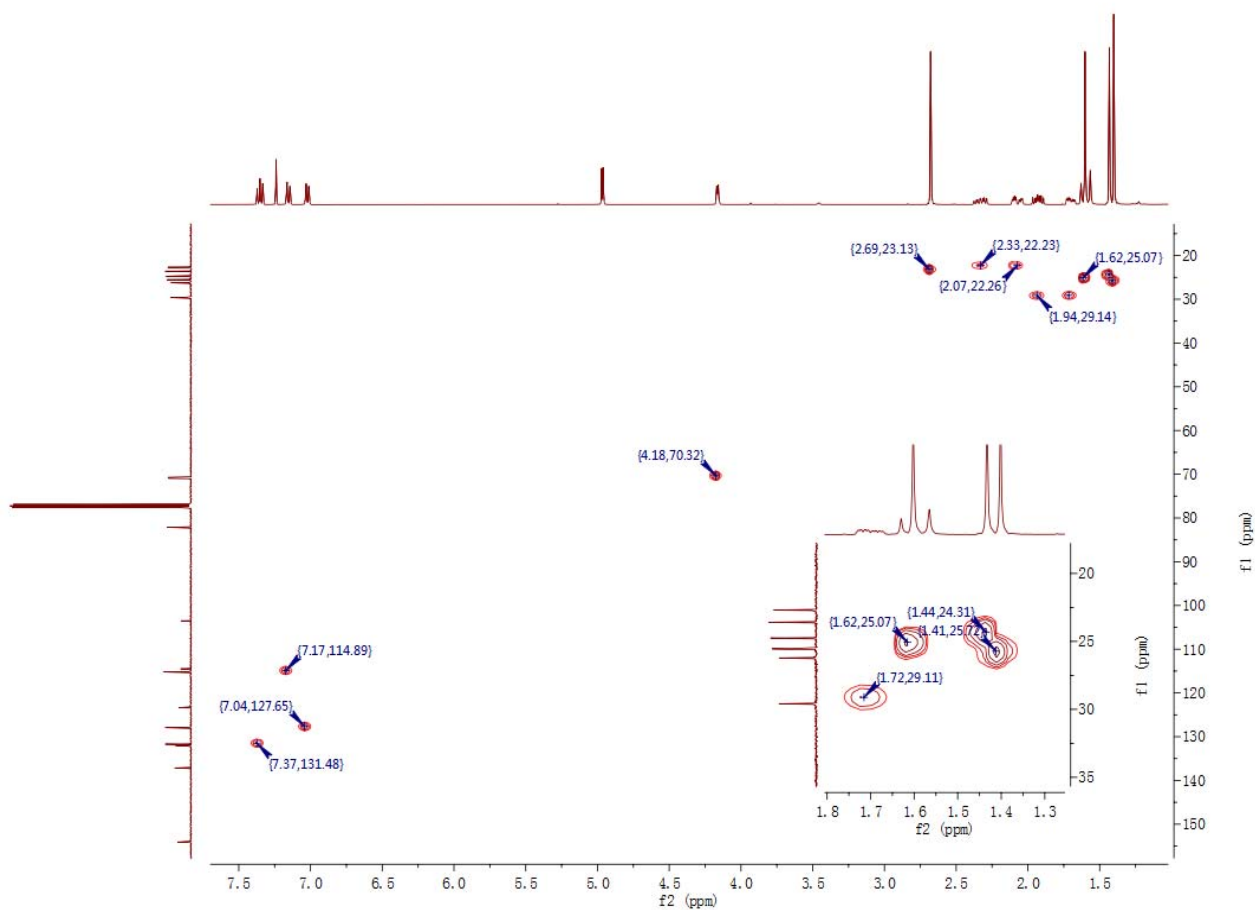

Figure S21 HMBC of Compound 2 in CD<sub>3</sub>Cl.

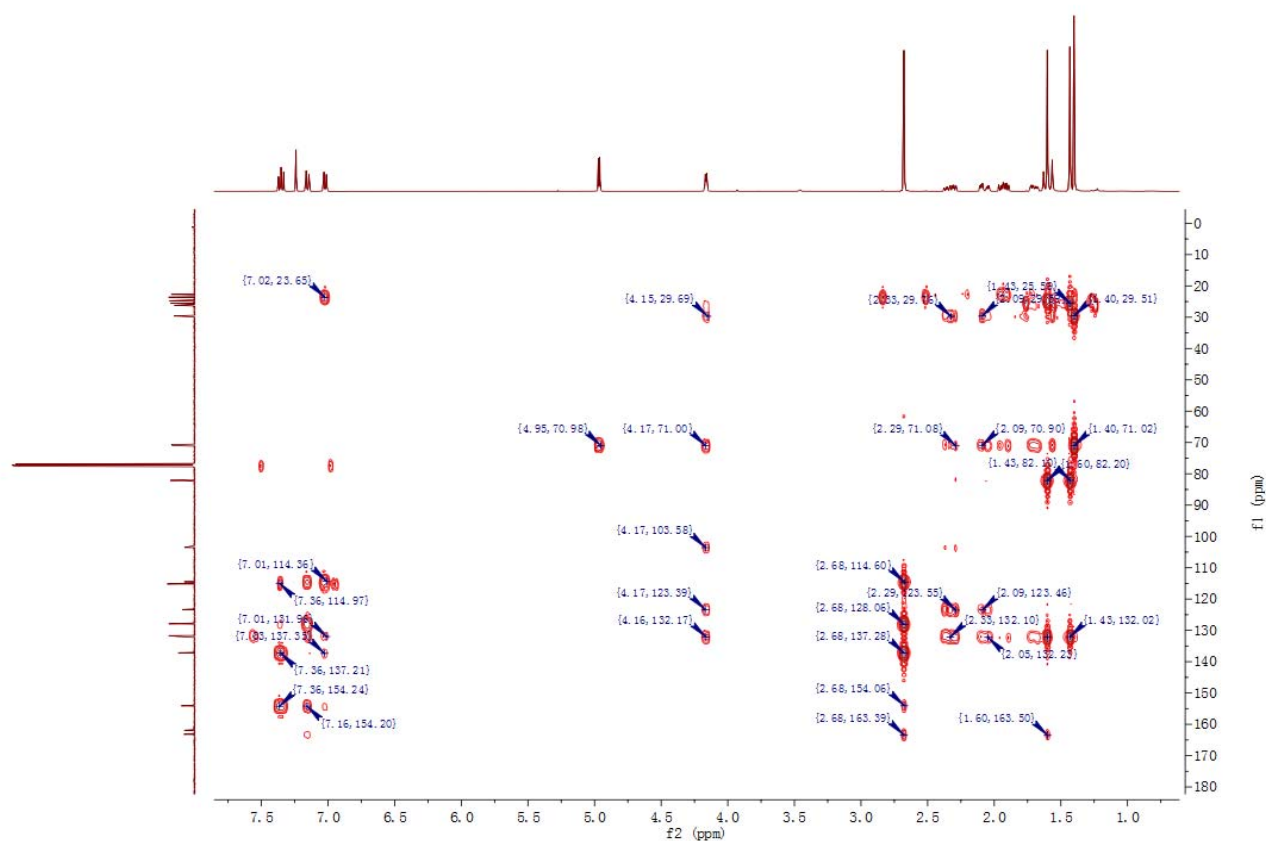

Figure S22 <sup>1</sup>H-<sup>1</sup>H COSY of Compound 2 in CD<sub>3</sub>Cl.

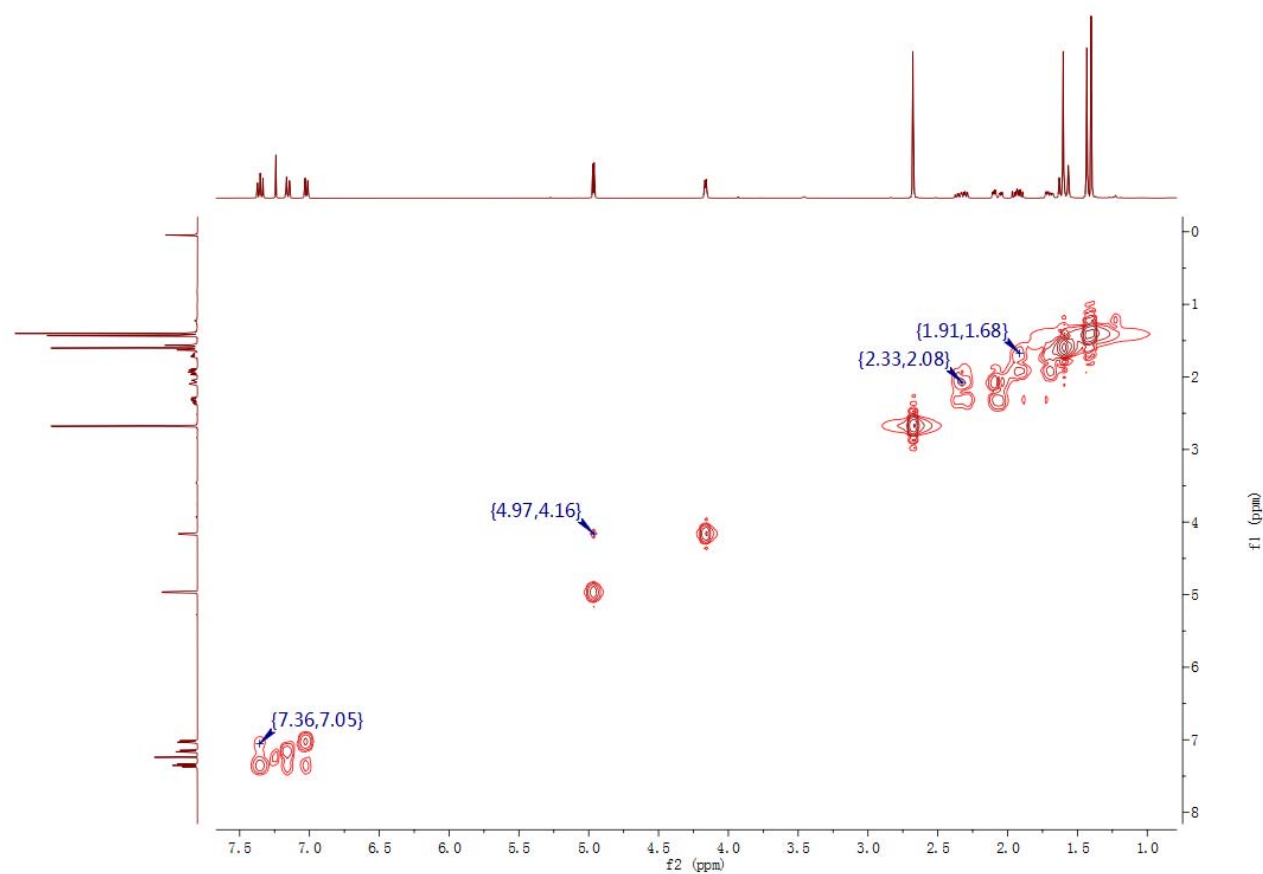

Figure S23 NOE of Compound 2 in CD<sub>3</sub>Cl.

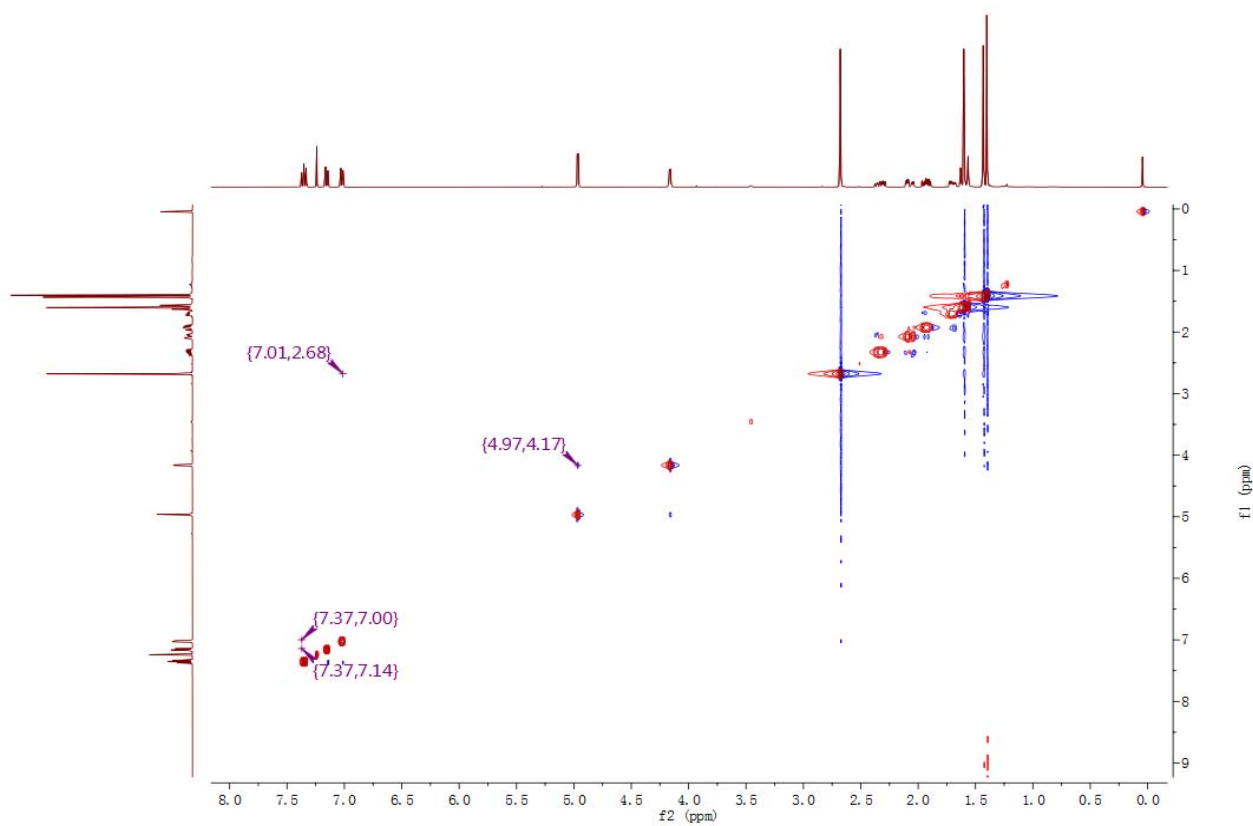

Figure S24 The crystal packing of Compound 2

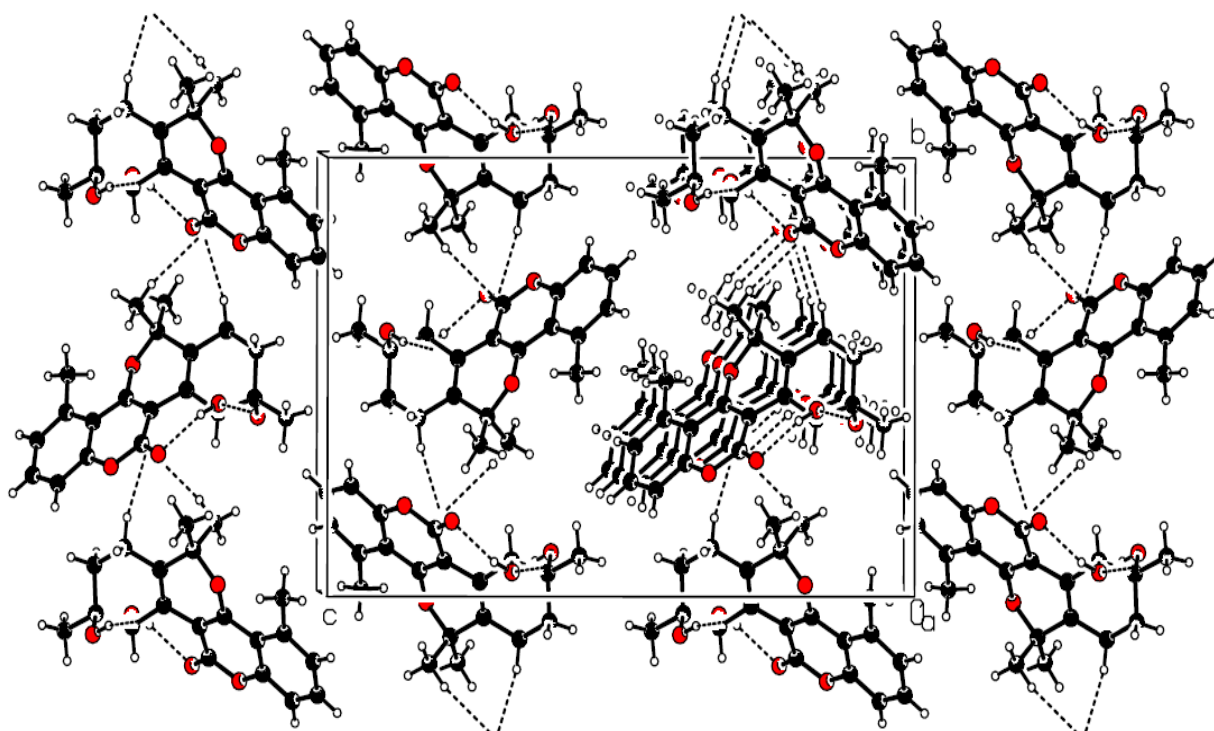

**Figure S25** Enantioseparation of Compound **2** by HPLC.

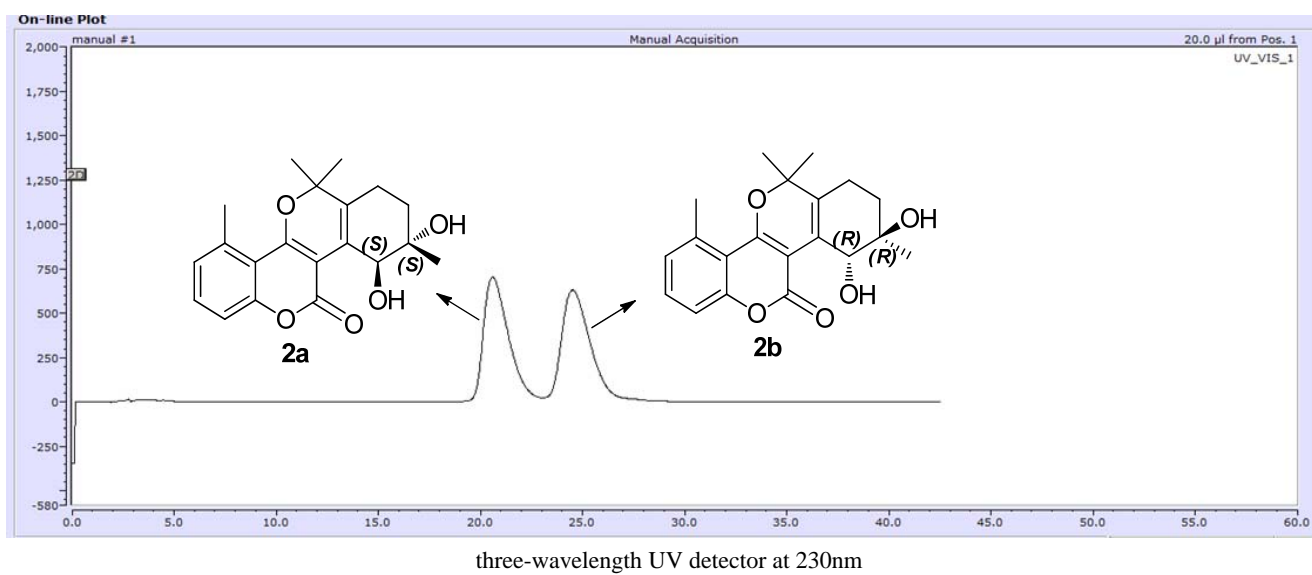

**Figure S26** The crystal packing of Compound **2a**

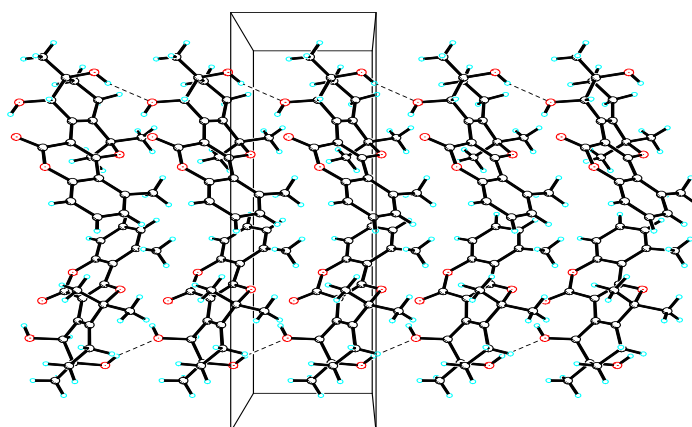

**Figure S27** ORTEP View of Compound **2a**

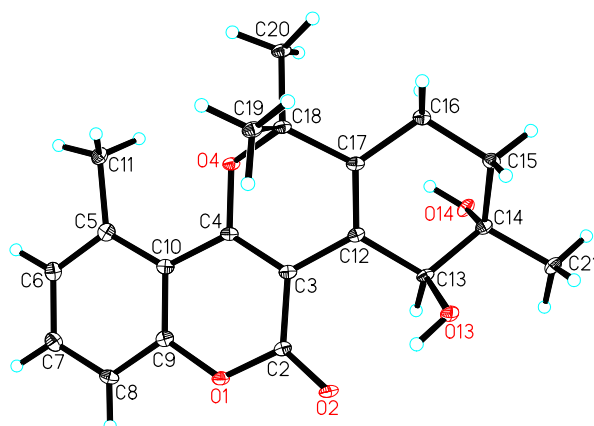

**Figure S28** HRESIMS of compound **3**

LL1-28-7 #24 RT: 0.33 AV: 1 NL: 4.71E7  
T: FTMS + p ESI Full ms [50.00-1500.00]

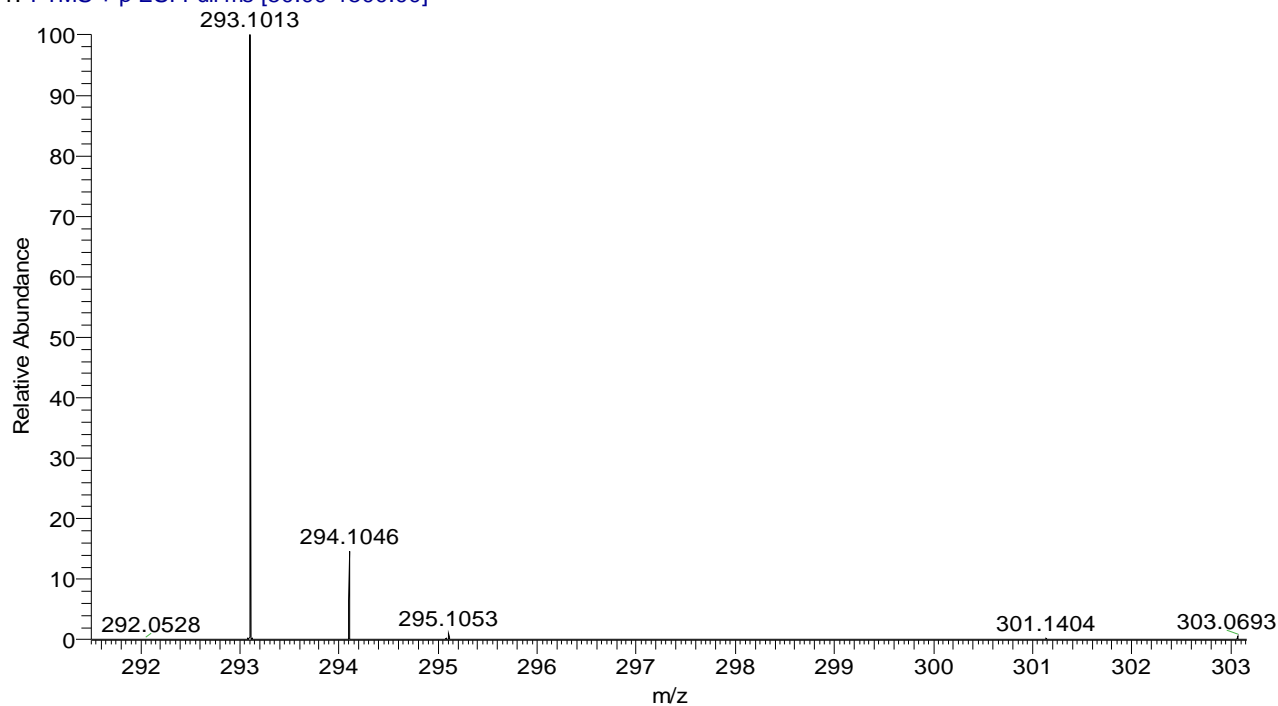

**Figure S29** IR spectrum of Compound **3**

E:\同济医学院\姚广民\20140314\LL-C1.0

仪器型号: Bruker Vertex 70

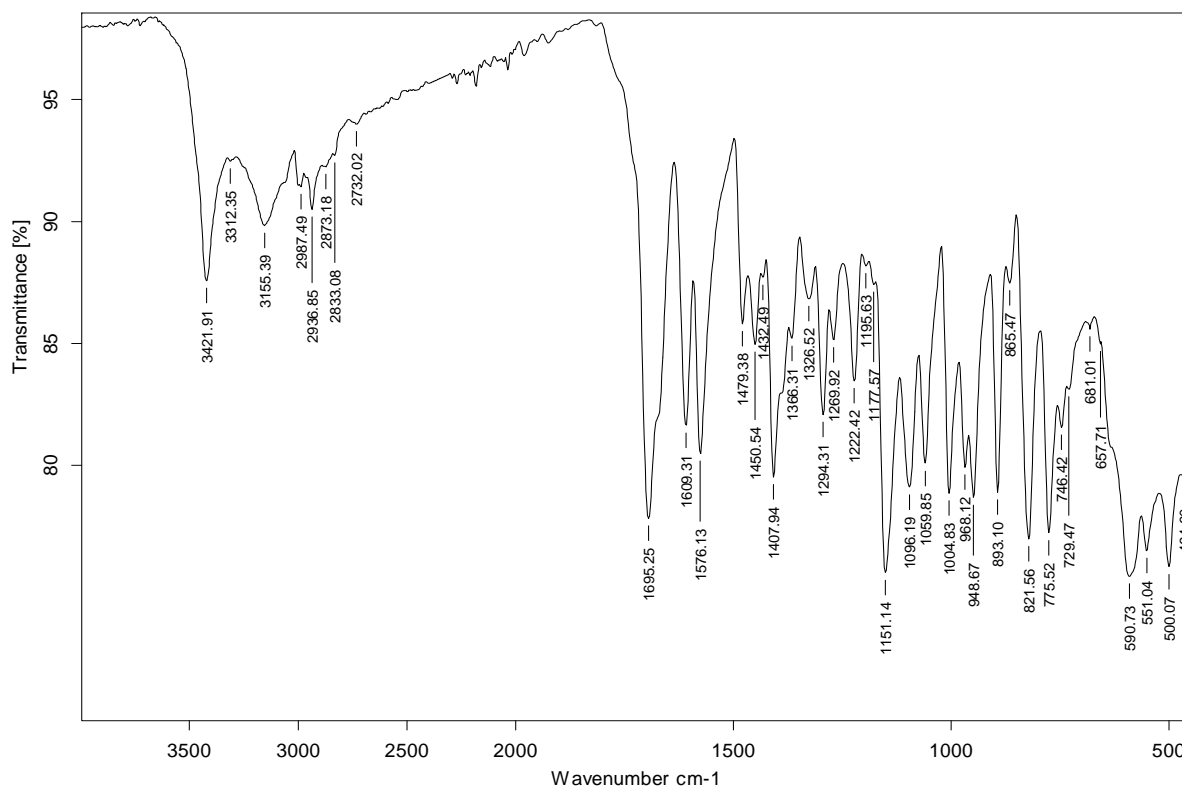



Figure S30 UV spectrum of Compound 3

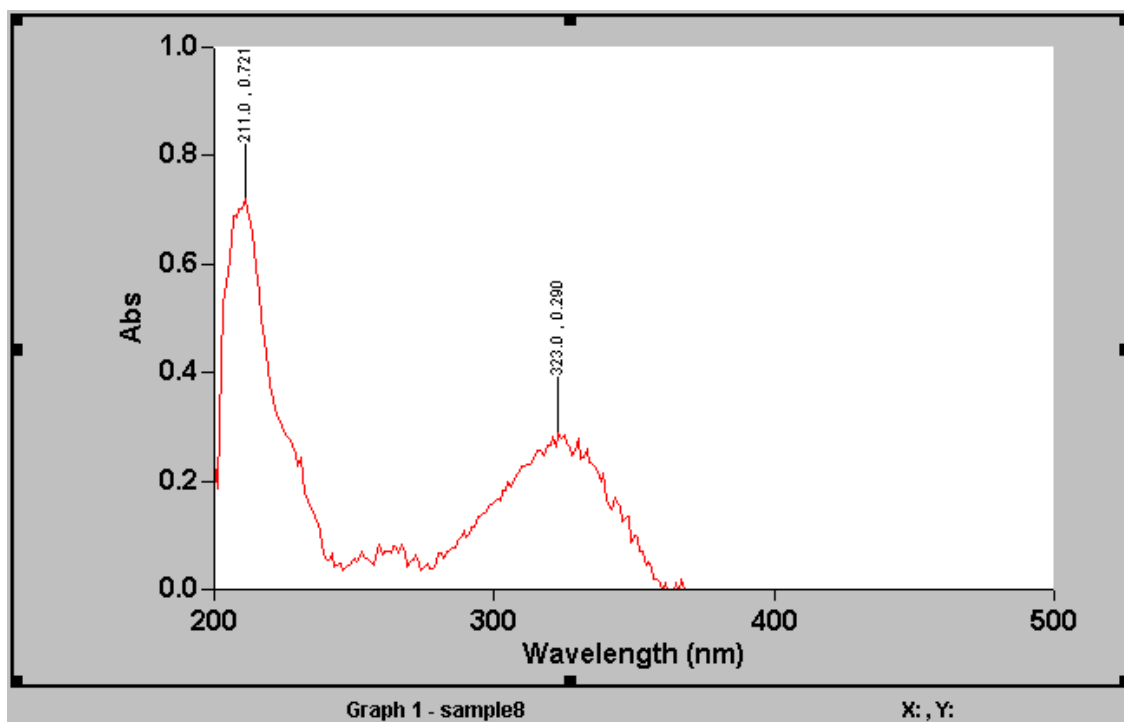

Figure S31 <sup>1</sup>H-NMR of Compound 3 in CD<sub>3</sub>OD, 400 MHz

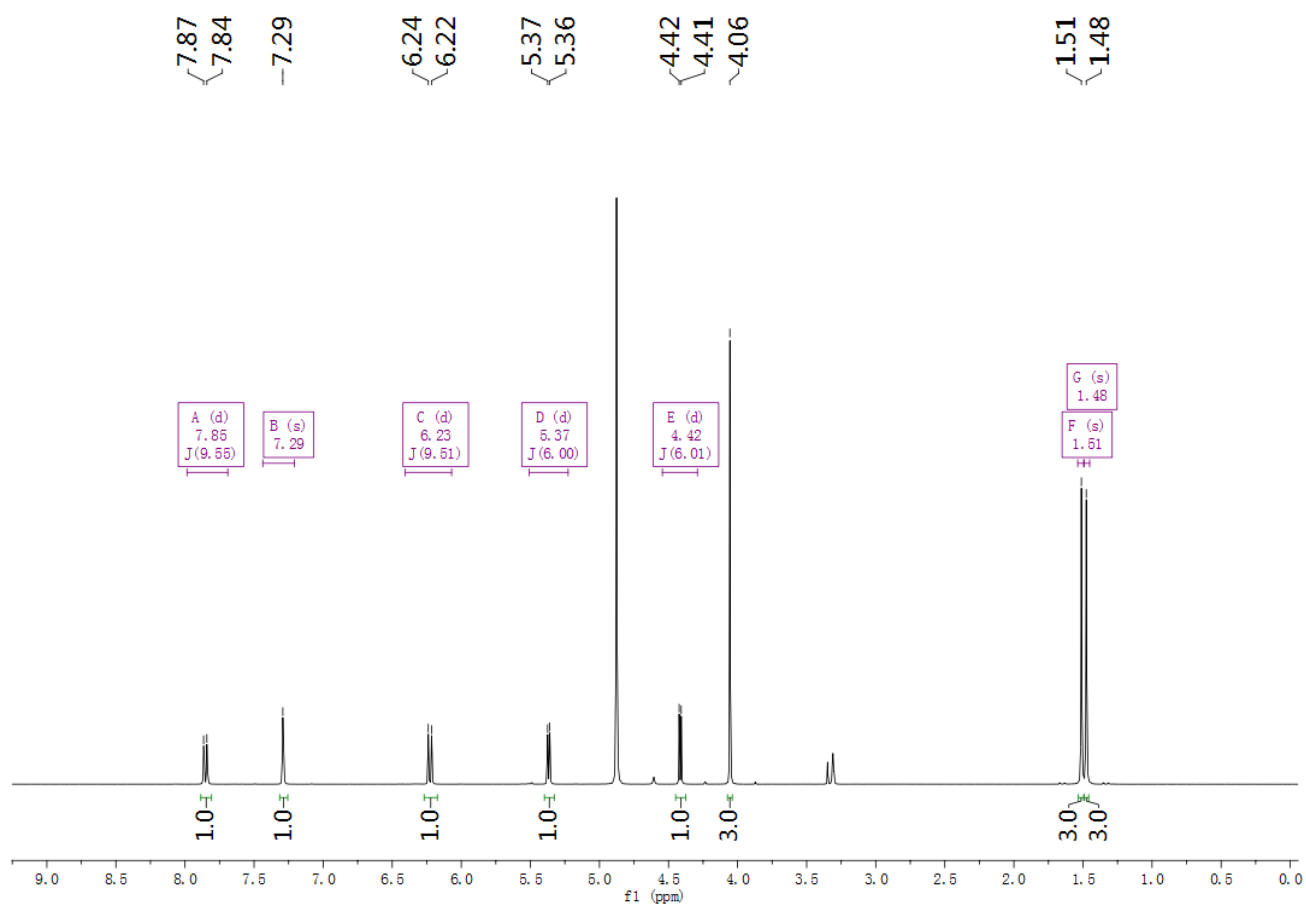

**Figure S32**  $^{13}\text{C}$ -NMR and DEPT of Compound **3** in  $\text{CD}_3\text{OD}$ , 100 MHz

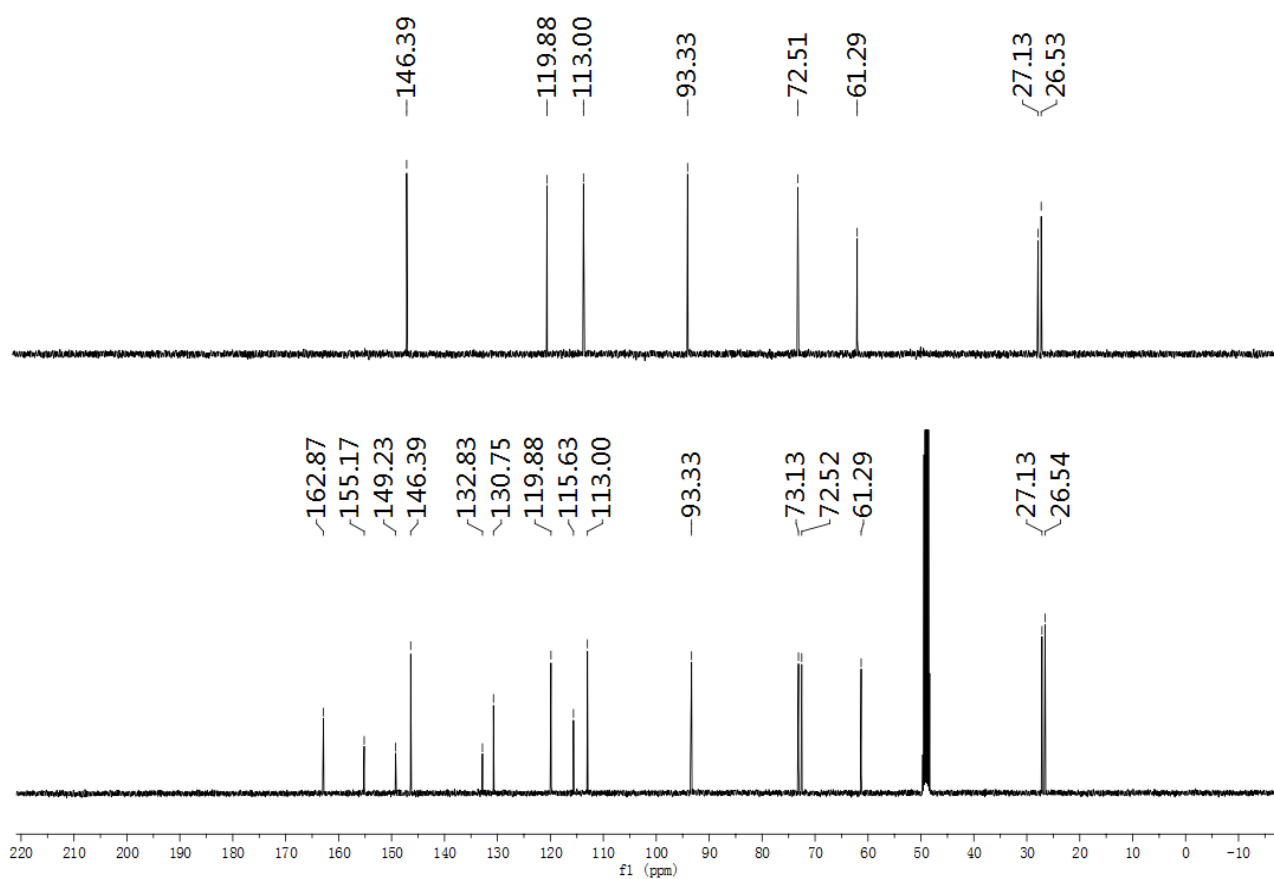

**Figure S33** HSQC of Compound **3** in  $\text{CD}_3\text{OD}$ .

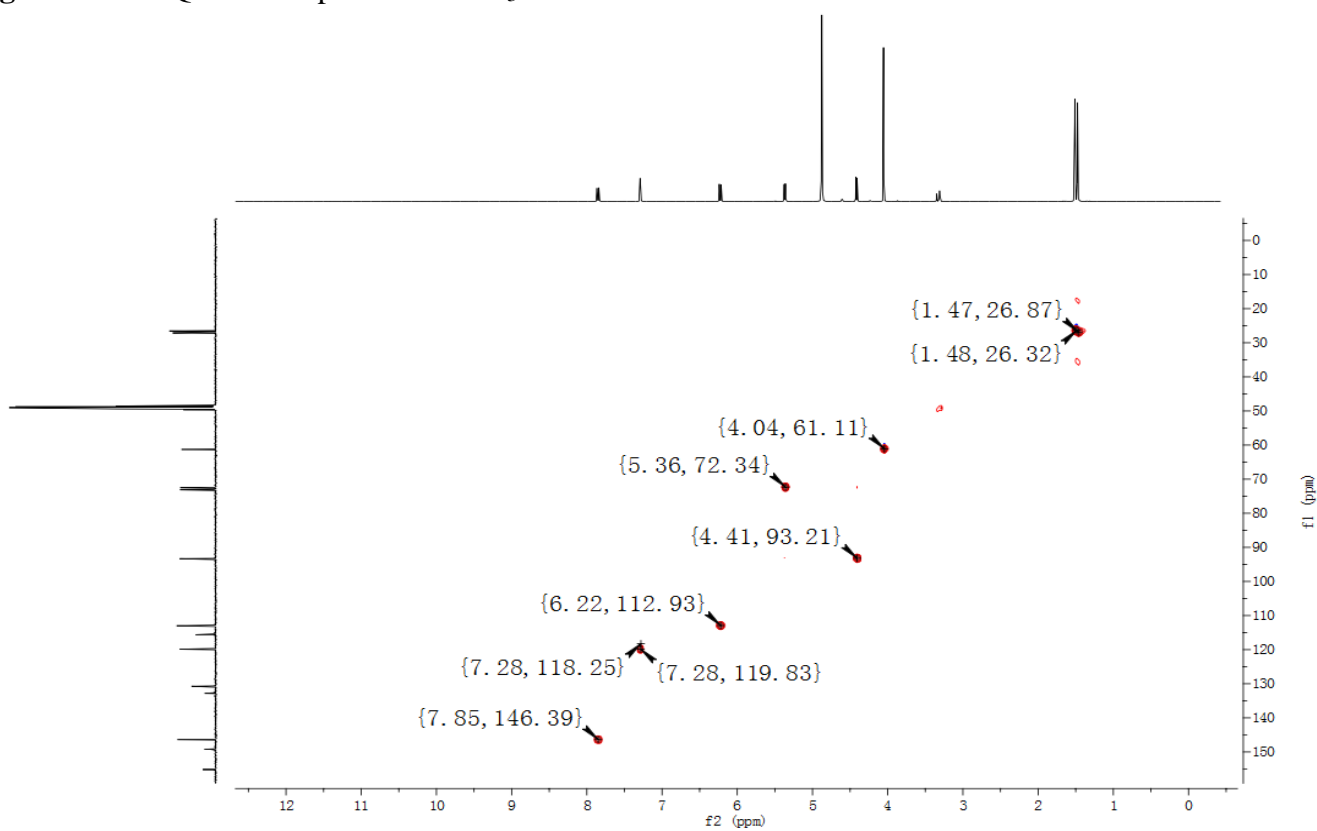

Figure S34 HMBC of Compound 3 in CD<sub>3</sub>OD.

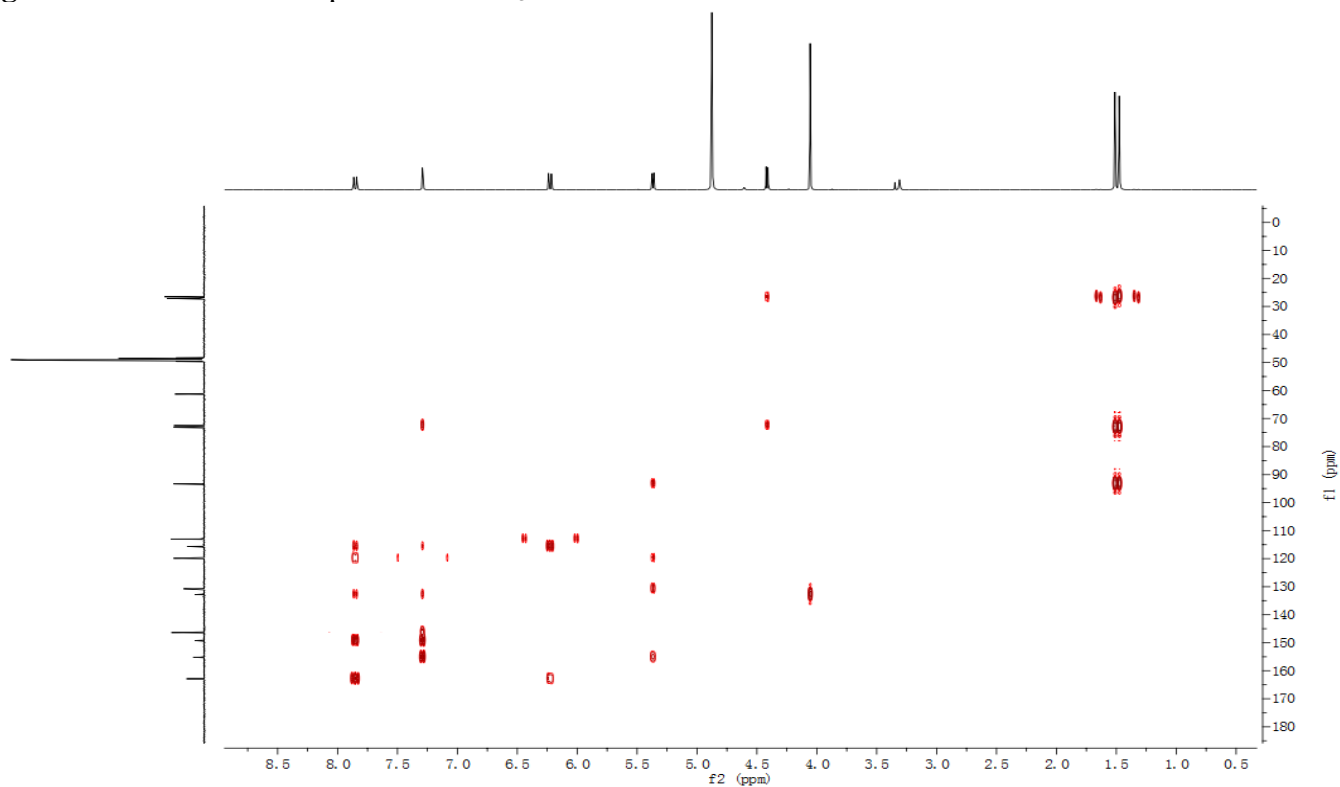

Figure S35 <sup>1</sup>H-<sup>1</sup>H COSY of Compound 3 in CD<sub>3</sub>OD.

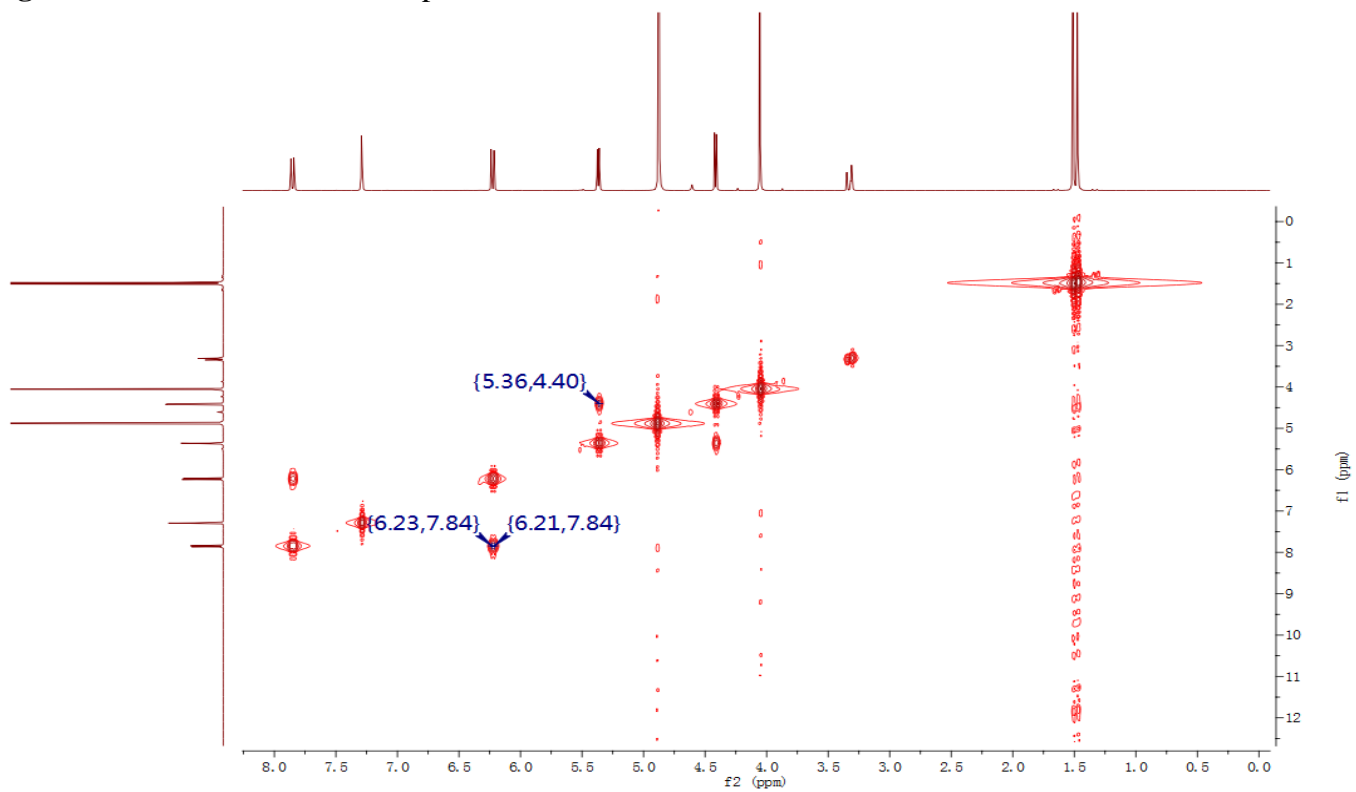

**Figure S36** The NOE of Compound **3** in CD<sub>3</sub>OD.

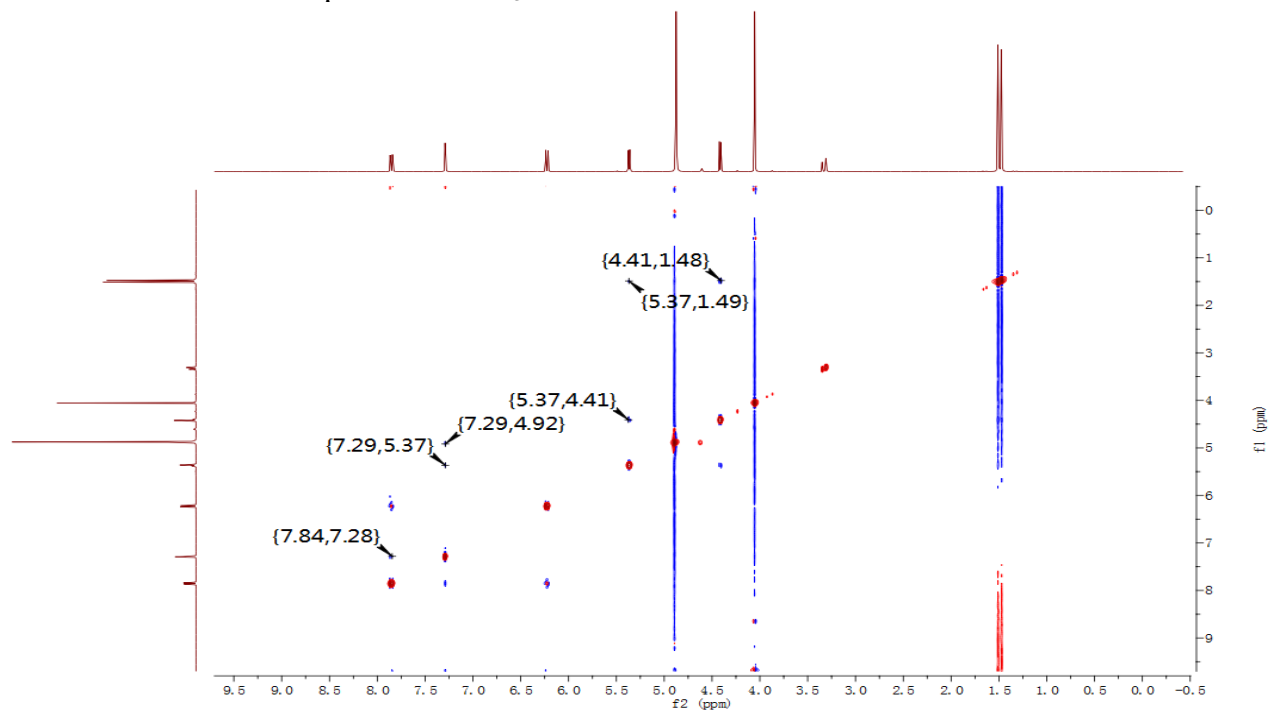

**Figure S37** The crystal packing of Compound **3**

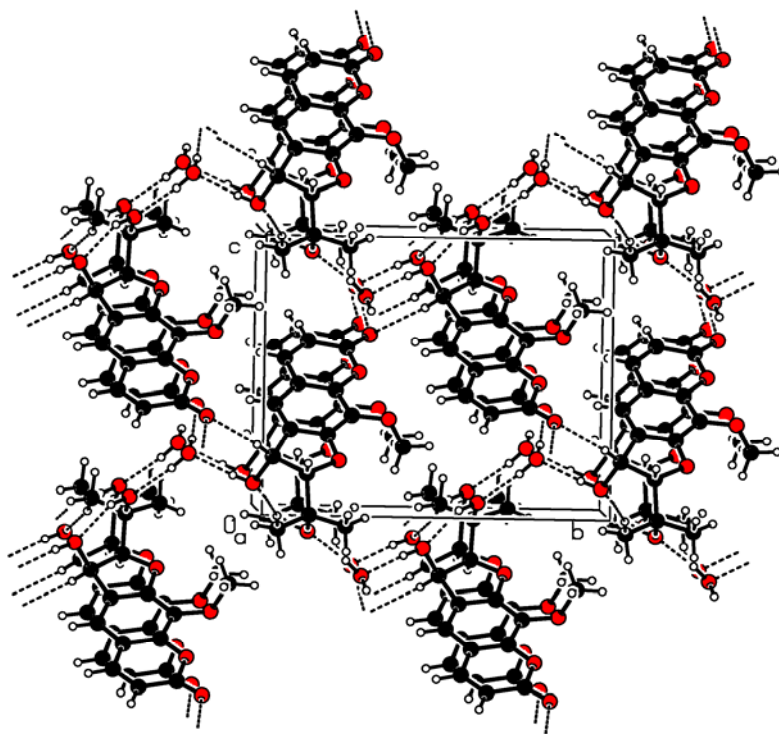

**Figure S38**  $^1\text{H-NMR}$  of Compound **4** in  $\text{CD}_3\text{OD}$ , 400 MHz

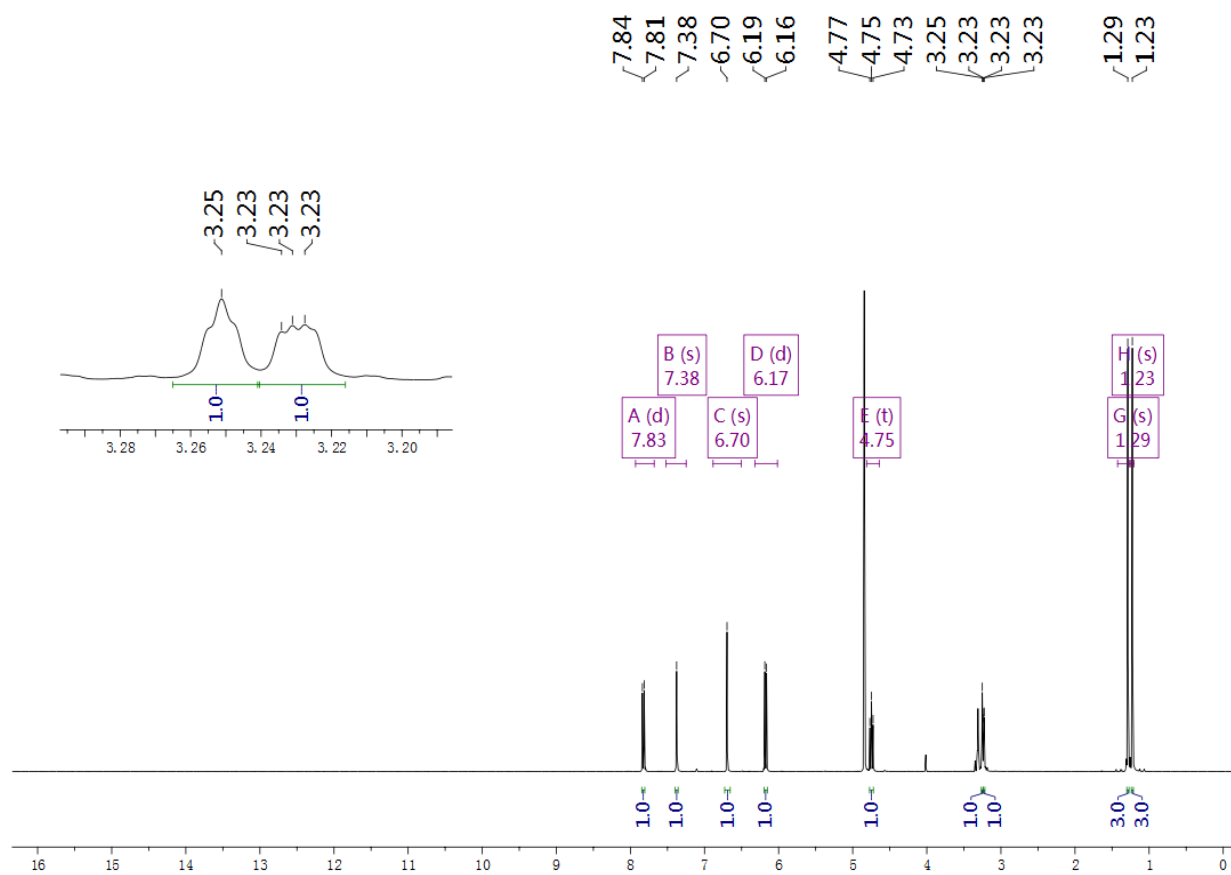

**Figure S39**  $^{13}\text{C-NMR}$  and DEPT of Compound **4** in  $\text{CD}_3\text{OD}$ , 100 MHz

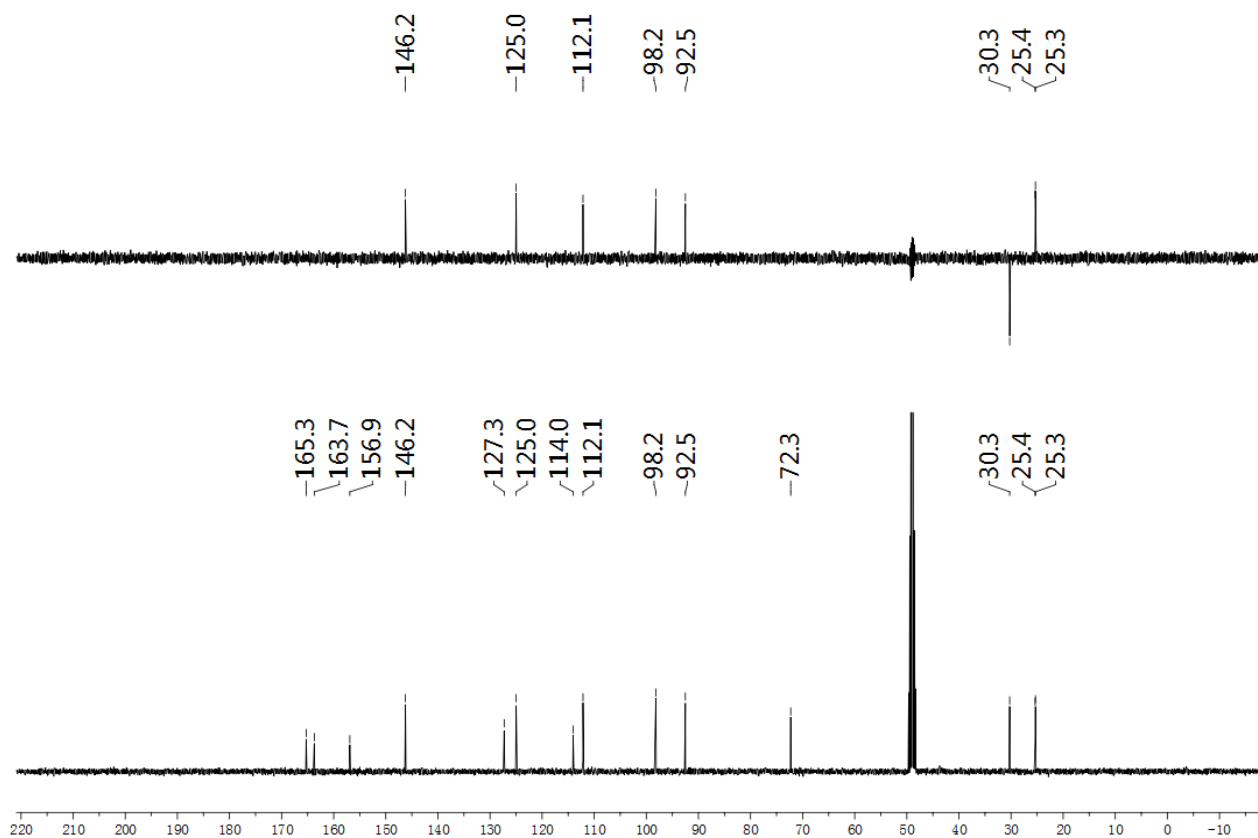

**Figure S40** ORTEP View and crystal packing of Compound 4

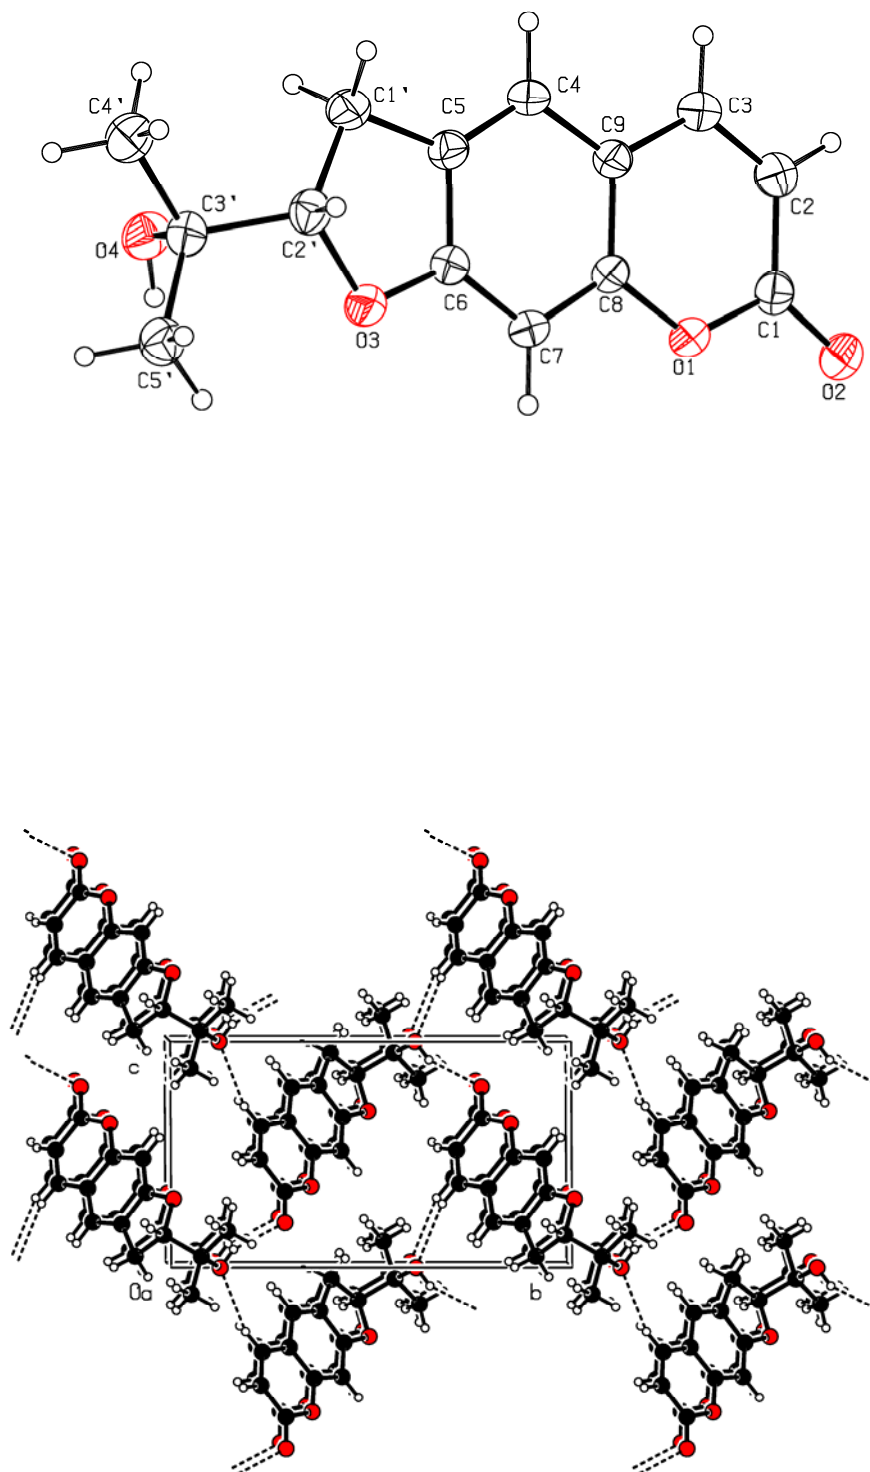

(CCDC No. 981340)

**Table 1.** Crystal data and structure refinement for Compound 4

| Crystal data and structure refinement for Compound 4 (CCDC No. 981340) |                                                                                         |
|------------------------------------------------------------------------|-----------------------------------------------------------------------------------------|
| Empirical formula                                                      | C <sub>14</sub> H <sub>14</sub> O <sub>4</sub>                                          |
| Formula weight                                                         | 246.25                                                                                  |
| Temperature                                                            | 298(2) K                                                                                |
| Wavelength                                                             | 1.54178 Å                                                                               |
| Crystal system                                                         | Monoclinic                                                                              |
| Space group                                                            | P2(1)                                                                                   |
| Unit cell dimensions                                                   | a = 5.72240(10) Å, = 90°<br>b = 13.8219(3) Å, = 100.5080(10)°<br>c = 7.8652(2) Å, = 90° |
| Volume                                                                 | 611.66(2) Å <sup>3</sup>                                                                |
| Z                                                                      | 2                                                                                       |
| Density (calculated)                                                   | 1.337 Mg/m <sup>3</sup>                                                                 |
| Absorption coefficient                                                 | 0.812 mm <sup>-1</sup>                                                                  |
| F(000)                                                                 | 260                                                                                     |
| Crystal size                                                           | 0.30 × 0.20 × 0.20 mm <sup>3</sup>                                                      |
| Theta range for data collection                                        | 5.72 to 71.23°                                                                          |
| Index ranges                                                           | -6 ≤ h ≤ 5, -16 ≤ k ≤ 16, -9 ≤ l ≤ 9                                                    |
| Reflections collected                                                  | 15379                                                                                   |
| Independent reflections                                                | 2265 [R(int) = 0.0386]                                                                  |
| Completeness to theta = 71.23°                                         | 96.6 %                                                                                  |
| Absorption correction                                                  | None                                                                                    |
| Max. and min. transmission                                             | 0.8544 and 0.7927                                                                       |
| Refinement method                                                      | Full-matrix least-squares on F <sup>2</sup>                                             |
| Data / restraints / parameters                                         | 2265 / 1 / 167                                                                          |
| Goodness-of-fit on F <sup>2</sup>                                      | 1.051                                                                                   |
| Final R indices [I > 2σ(I)]                                            | R1 = 0.0290, wR2 = 0.0809                                                               |
| R indices (all data)                                                   | R1 = 0.0290, wR2 = 0.0809                                                               |
| Absolute structure parameter                                           | 0.06(14)                                                                                |
| Extinction coefficient                                                 | 0.073(4)                                                                                |
| Largest diff. peak and hole                                            | 0.181 and -0.144 e. Å <sup>-3</sup>                                                     |

**Figure S41.** <sup>1</sup>H-NMR of Compound 5 in CD<sub>3</sub>Cl, 400 MHz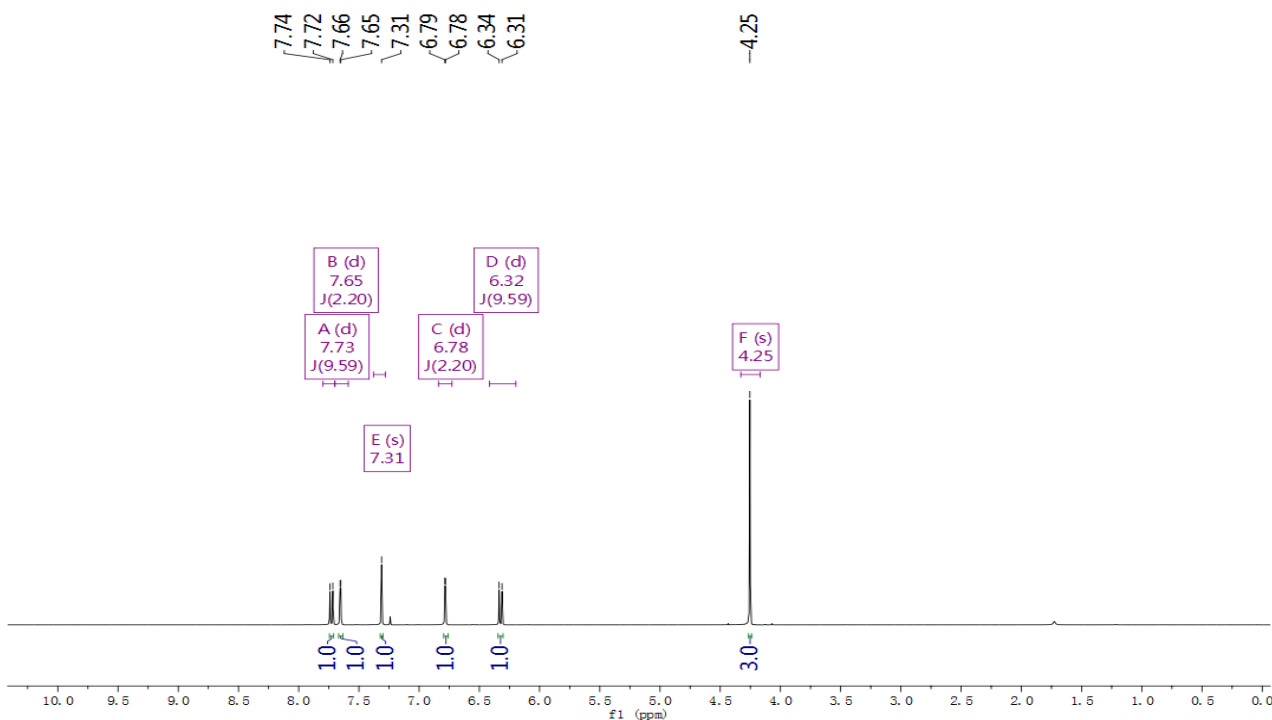

**Figure S42.**  $^{13}\text{C}$ -NMR of Compound **5** in  $\text{CD}_3\text{Cl}$ , 100 MHz

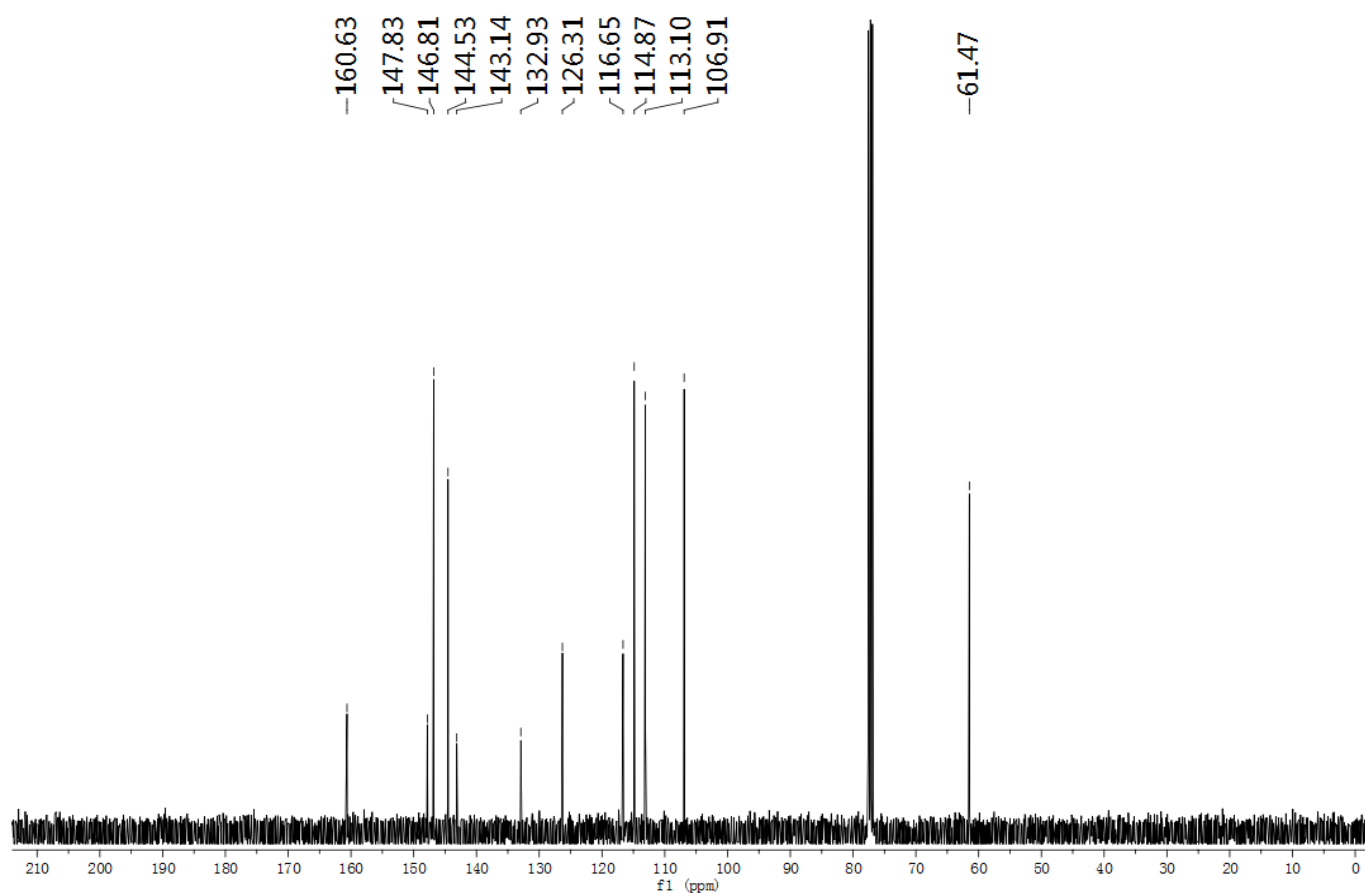

**Figure S43** ORTEP View and crystal packing of Compound **5**

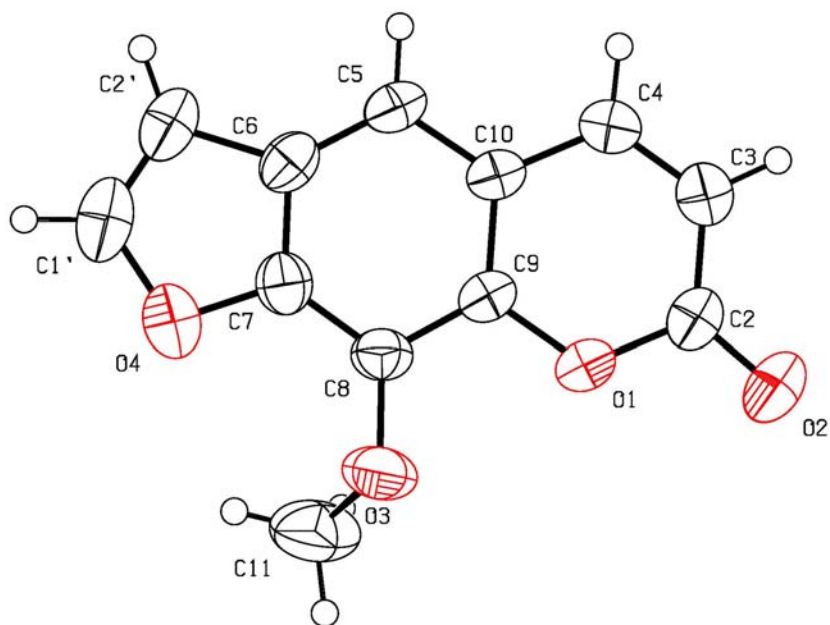



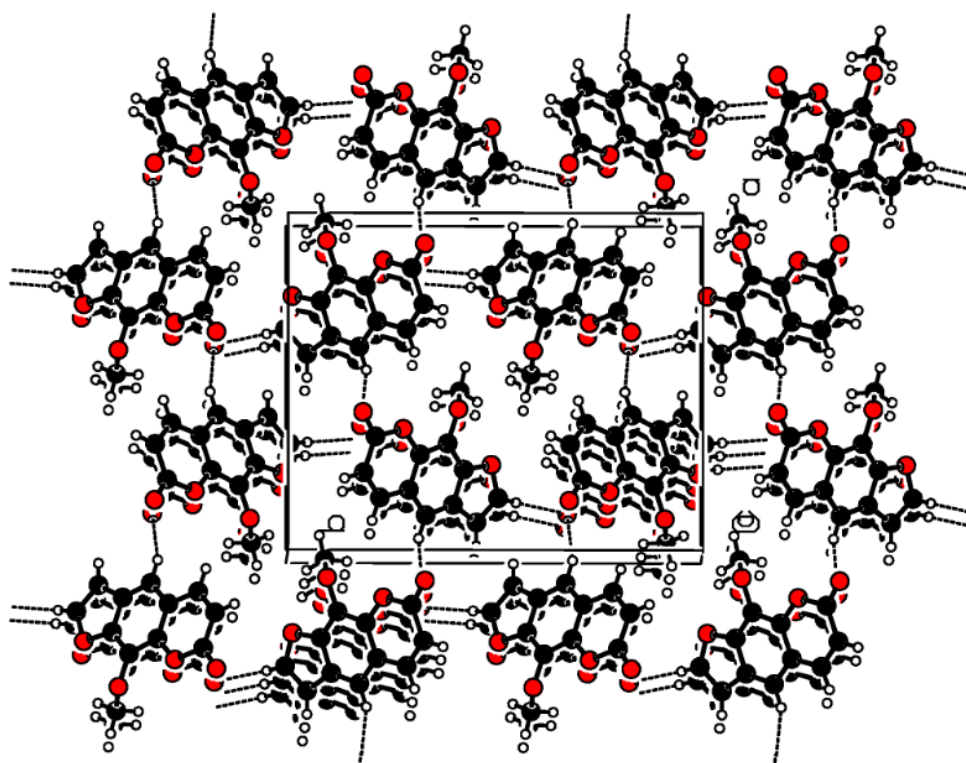

(CCDC No. 981341)

**Table 2.** Crystal data and structure refinement for Compound 5

| Crystal data and structure refinement for Compound 5 (CCDC No. 981341) |                                                                            |
|------------------------------------------------------------------------|----------------------------------------------------------------------------|
| Empirical formula                                                      | C <sub>12</sub> H <sub>8</sub> O <sub>4</sub>                              |
| Formula weight                                                         | 246.25                                                                     |
| Temperature                                                            | 298(2) K                                                                   |
| Wavelength                                                             | 0.71073 Å                                                                  |
| Crystal system                                                         | Orthorhombic                                                               |
| Space group                                                            | Pna2(1)                                                                    |
| Unit cell dimensions                                                   | a = 12.883(2) Å, = 90°<br>b = 15.779(2) Å, = 90°<br>c = 4.8658(8) Å, = 90° |
| Volume                                                                 | 989.1(3) Å <sup>3</sup>                                                    |
| Z                                                                      | 4                                                                          |
| Density (calculated)                                                   | 1.452 Mg/m <sup>3</sup>                                                    |
| Absorption coefficient                                                 | 0.110 mm <sup>-1</sup>                                                     |
| F(000)                                                                 | 448                                                                        |
| Crystal size                                                           | 0.15 × 0.12 × 0.10 mm <sup>3</sup>                                         |
| Theta range for data collection                                        | 2.04 to 29.98°                                                             |
| Index ranges                                                           | -18 ≤ h ≤ 15, -22 ≤ k ≤ 22, -6 ≤ l ≤ 6                                     |
| Reflections collected                                                  | 9922                                                                       |
| Independent reflections                                                | 2863 [R(int) = 0.0749]                                                     |
| Completeness to theta = 71.23°                                         | 100.0 %                                                                    |
| Absorption correction                                                  | None                                                                       |
| Max. and min. transmission                                             | 0.9890 and 0.9836                                                          |
| Refinement method                                                      | Full-matrix least-squares on F <sup>2</sup>                                |
| Data / restraints / parameters                                         | 2863 / 1 / 146                                                             |
| Goodness-of-fit on F <sup>2</sup>                                      | 1.007                                                                      |
| Final R indices [I > 2σ(I)]                                            | R1 = 0.0486, wR2 = 0.1265                                                  |
| R indices (all data)                                                   | R1 = 0.0694, wR2 = 0.1467                                                  |
| Largest diff. peak and hole                                            | 0.234 and -0.267 e.Å <sup>-3</sup>                                         |

Figure S44.  $^1\text{H-NMR}$  of Compound **6** in  $\text{CD}_3\text{Cl}$ , 400 MHz

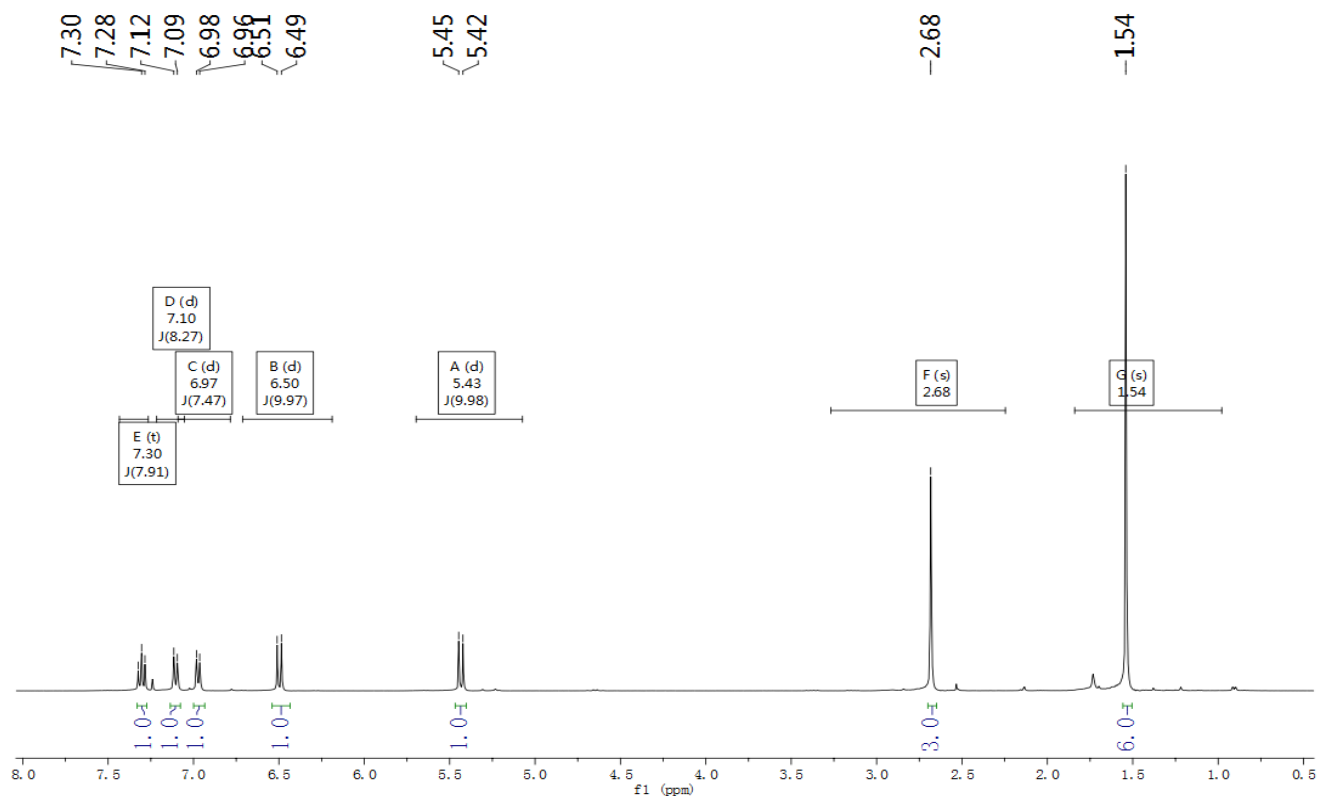

Figure S45.  $^{13}\text{C-NMR}$  of Compound **6** in  $\text{CD}_3\text{Cl}$ , 100 MHz

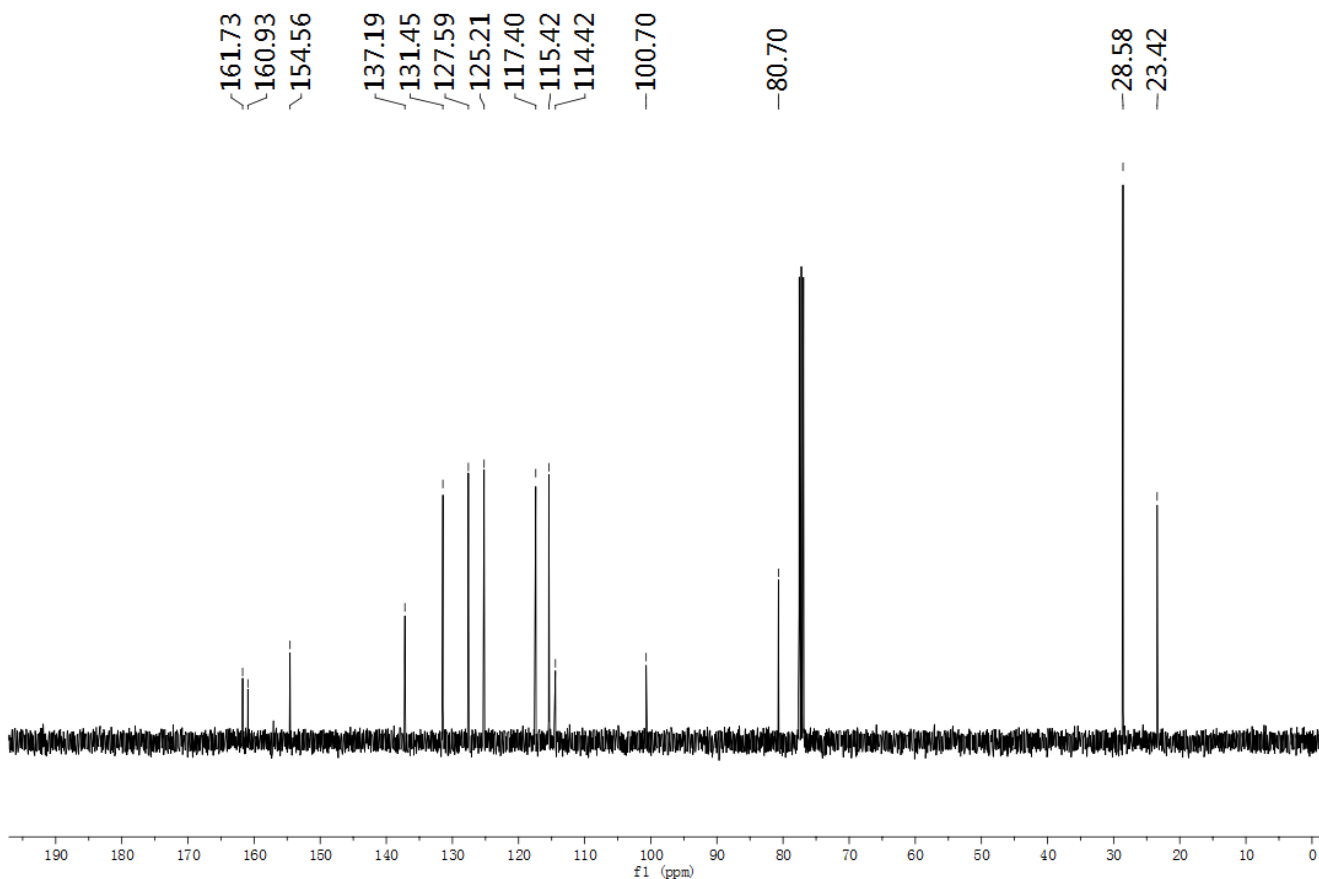

## checkCIF/PLATON report

You have not supplied any structure factors. As a result the full set of tests cannot be run.

THIS REPORT IS FOR GUIDANCE ONLY. IF USED AS PART OF A REVIEW PROCEDURE FOR PUBLICATION, IT SHOULD NOT REPLACE THE EXPERTISE OF AN EXPERIENCED CRYSTALLOGRAPHIC REFEREE.

No syntax errors found.      CIF dictionary      Interpreting this report

### Datablock: g\_\_140425f\_work\_cu\_140425f\_0m

---

Bond precision:    C-C = 0.0027 A                      Wavelength=1.54178

Cell:              a=7.2247(2)              b=7.6916(2)              c=16.5807(3)  
                    alpha=79.102(1)          beta=82.835(1)          gamma=89.821(1)

Temperature:      298 K

|                | Calculated  | Reported    |
|----------------|-------------|-------------|
| Volume         | 897.50(4)   | 897.50(4)   |
| Space group    | P -1        | P-1         |
| Hall group     | -P 1        | ?           |
| Moiety formula | C20 H26 O4  | ?           |
| Sum formula    | C20 H26 O4  | C20 H26 O4  |
| Mr             | 330.41      | 330.41      |
| Dx,g cm-3      | 1.223       | 1.223       |
| Z              | 2           | 2           |
| Mu (mm-1)      | 0.675       | 0.675       |
| F000           | 356.0       | 356.0       |
| F000'          | 357.08      |             |
| h,k,lmax       | 8,9,19      | 8,8,19      |
| Nref           | 3044        | 2917        |
| Tmin,Tmax      | 0.922,0.935 | 0.877,0.936 |
| Tmin'          | 0.874       |             |

Correction method= NONE

Data completeness= 0.958                      Theta(max)= 64.960

R(reflections)= 0.0482( 2568)              wR2(reflections)= 0.1336( 2917)

S = 1.028                                      Npar= 363

---

The following ALERTS were generated. Each ALERT has the format  
**test-name\_ALERT\_alert-type\_alert-level.**  
Click on the hyperlinks for more details of the test.

---

**Alert level B**

PLAT029\_ALERT\_3\_B \_diffn\_measured\_fraction\_theta\_full Low ..... 0.958 Note

**Alert level C**

ABSTY03\_ALERT\_1\_C The \_exptl\_absorpt\_correction\_type has been given as none.  
However values have been given for Tmin and Tmax. Remove these if an absorption correction has not been applied.  
From the CIF: \_exptl\_absorpt\_correction\_T\_min 0.877  
From the CIF: \_exptl\_absorpt\_correction\_T\_max 0.936  
REFNR01\_ALERT\_3\_C Ratio of reflections to parameters is < 10 for a centrosymmetric structure  
sine(theta)/lambda 0.5876  
Proportion of unique data used 1.0000  
Ratio reflections to parameters 8.0358  
THETM01\_ALERT\_3\_C The value of sine(theta\_max)/wavelength is less than 0.590  
Calculated sin(theta\_max)/wavelength = 0.5876  
PLAT088\_ALERT\_3\_C Poor Data / Parameter Ratio ..... 8.39 Note  
PLAT220\_ALERT\_2\_C Large Non-Solvent C Ueq(max)/Ueq(min) Range 3.8 Ratio  
PLAT222\_ALERT\_3\_C Large Non-Solvent H Uiso(max)/Uiso(min) .. 4.7 Ratio  
PLAT234\_ALERT\_4\_C Large Hirshfeld Difference O1' -- C9 .. 0.16 Ang.  
PLAT250\_ALERT\_2\_C Large U3/U1 Ratio for Average U(i,j) Tensor .... 2.3 Note

**Alert level G**

PLAT002\_ALERT\_2\_G Number of Distance or Angle Restraints on AtSite 34 Note  
PLAT005\_ALERT\_5\_G No \_iucr\_refine\_instructions\_details in the CIF Please Do !  
PLAT007\_ALERT\_5\_G Number of Unrefined Donor-H Atoms ..... 4 Report  
PLAT093\_ALERT\_1\_G No su's on H-positions, refinement reported as . mixed  
PLAT154\_ALERT\_1\_G The su's on the Cell Angles are Equal ..... 0.00100 Degree  
PLAT230\_ALERT\_2\_G Hirshfeld Test Diff for C11 -- C19 .. 6.8 su  
PLAT301\_ALERT\_3\_G Main Residue Disorder ..... Percentage = 71 Note  
PLAT779\_ALERT\_4\_G Suspect or Irrelevant (Bond) Angle in CIF .... # 16 Check  
O1 -C9 -O1' 1.555 1.555 1.555 2.50 Deg.  
PLAT779\_ALERT\_4\_G Suspect or Irrelevant (Bond) Angle in CIF .... # 24 Check  
C4 -C10 -C4' 1.555 1.555 1.555 20.70 Deg.  
PLAT793\_ALERT\_4\_G The Model has Chirality at C11 ..... R Verify  
PLAT793\_ALERT\_4\_G The Model has Chirality at C12 ..... R Verify  
PLAT793\_ALERT\_4\_G The Model has Chirality at C11' ..... S Verify  
PLAT793\_ALERT\_4\_G The Model has Chirality at C12' ..... S Verify  
PLAT811\_ALERT\_5\_G No ADDSYM Analysis: Too Many Excluded Atoms .... ! Info  
PLAT860\_ALERT\_3\_G Number of Least-Squares Restraints ..... 40 Note  
PLAT899\_ALERT\_4\_G SHELXL97 is Deprecated and Succeeded by SHELXL 2014 Note

0 **ALERT level A** = Most likely a serious problem - resolve or explain  
1 **ALERT level B** = A potentially serious problem, consider carefully  
8 **ALERT level C** = Check. Ensure it is not caused by an omission or oversight  
16 **ALERT level G** = General information/check it is not something unexpected

3 ALERT type 1 CIF construction/syntax error, inconsistent or missing data  
4 ALERT type 2 Indicator that the structure model may be wrong or deficient  
7 ALERT type 3 Indicator that the structure quality may be low  
8 ALERT type 4 Improvement, methodology, query or suggestion  
3 ALERT type 5 Informative message, check

It is advisable to attempt to resolve as many as possible of the alerts in all categories. Often the minor alerts point to easily fixed oversights, errors and omissions in your CIF or refinement strategy, so attention to these fine details can be worthwhile. In order to resolve some of the more serious problems it may be necessary to carry out additional measurements or structure refinements. However, the purpose of your study may justify the reported deviations and the more serious of these should normally be commented upon in the discussion or experimental section of a paper or in the "special\_details" fields of the CIF. checkCIF was carefully designed to identify outliers and unusual parameters, but every test has its limitations and alerts that are not important in a particular case may appear. Conversely, the absence of alerts does not guarantee there are no aspects of the results needing attention. It is up to the individual to critically assess their own results and, if necessary, seek expert advice.

### **Publication of your CIF in IUCr journals**

A basic structural check has been run on your CIF. These basic checks will be run on all CIFs submitted for publication in IUCr journals (*Acta Crystallographica*, *Journal of Applied Crystallography*, *Journal of Synchrotron Radiation*); however, if you intend to submit to *Acta Crystallographica Section C* or *E*, you should make sure that full publication checks are run on the final version of your CIF prior to submission.

### **Publication of your CIF in other journals**

Please refer to the *Notes for Authors* of the relevant journal for any special instructions relating to CIF submission.

---

**PLATON version of 20/08/2014; check.def file version of 18/08/2014**

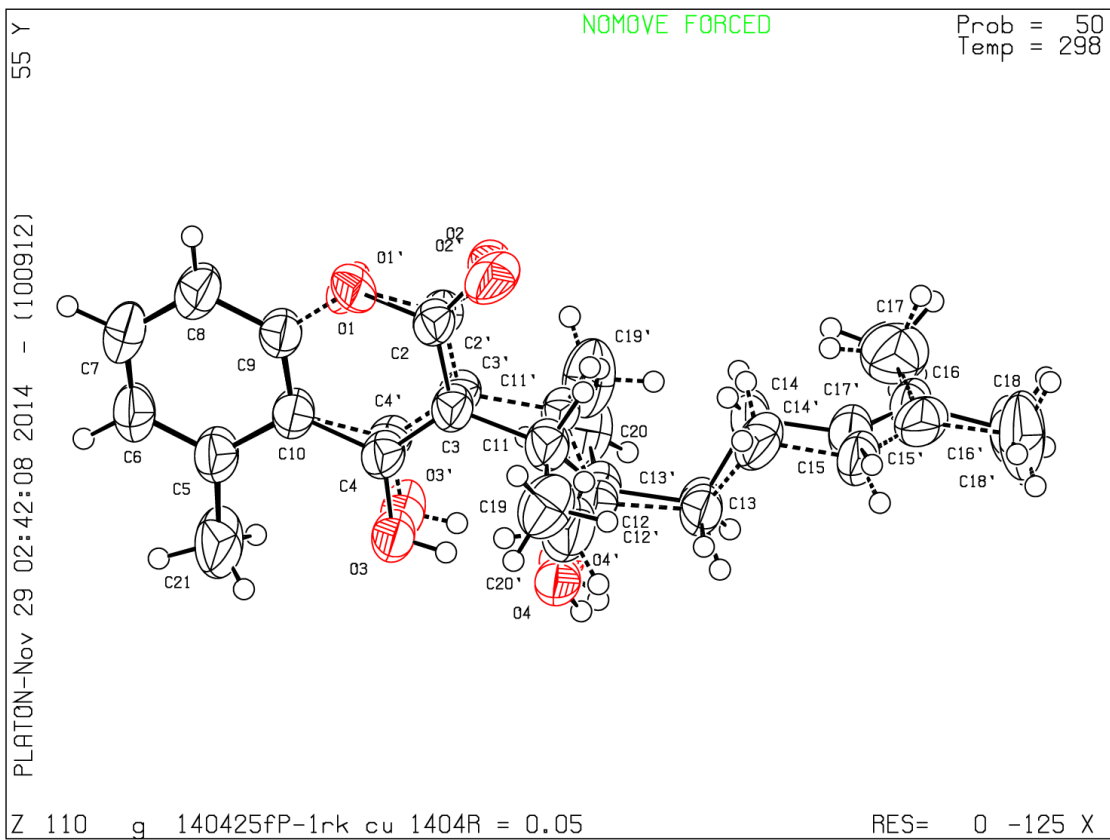

## checkCIF/PLATON report

You have not supplied any structure factors. As a result the full set of tests cannot be run.

THIS REPORT IS FOR GUIDANCE ONLY. IF USED AS PART OF A REVIEW PROCEDURE FOR PUBLICATION, IT SHOULD NOT REPLACE THE EXPERTISE OF AN EXPERIENCED CRYSTALLOGRAPHIC REFEREE.

No syntax errors found.      CIF dictionary      Interpreting this report

### Datablock: e\_\_131228a\_work\_cu\_131228a\_0m

---

Bond precision:    C-C = 0.0068 A                      Wavelength=1.54178

Cell:              a=7.2264(2)              b=7.6852(2)              c=16.5860(3)  
                    alpha=100.897(1)          beta=96.983(1)          gamma=90.124(1)

Temperature:      296 K

|                | Calculated  | Reported    |
|----------------|-------------|-------------|
| Volume         | 897.51(4)   | 897.51(4)   |
| Space group    | P 1         | P1          |
| Hall group     | P 1         | ?           |
| Moiety formula | C20 H26 O4  | ?           |
| Sum formula    | C20 H26 O4  | C20 H26 O4  |
| Mr             | 330.41      | 330.41      |
| Dx,g cm-3      | 1.223       | 1.223       |
| Z              | 2           | 2           |
| Mu (mm-1)      | 0.675       | 0.675       |
| F000           | 356.0       | 356.0       |
| F000'          | 357.08      |             |
| h,k,lmax       | 8,9,19      | 8,9,19      |
| Nref           | 6482[ 3241] | 5691        |
| Tmin,Tmax      | 0.922,0.935 | 0.877,0.936 |
| Tmin'          | 0.874       |             |

Correction method= NONE

Data completeness= 1.76/0.88                      Theta(max)= 67.460

R(reflections)= 0.0681( 5462)                      wR2(reflections)= 0.1932( 5691)

S = 1.120                                              Npar= 446

---

The following ALERTS were generated. Each ALERT has the format  
**test-name\_ALERT\_alert-type\_alert-level.**  
Click on the hyperlinks for more details of the test.

---

### ● Alert level B

|                   |                                     |      |           |       |      |
|-------------------|-------------------------------------|------|-----------|-------|------|
| PLAT029_ALERT_3_B | _diffn_measured_fraction_theta_full | Low  | .....     | 0.950 | Note |
| PLAT230_ALERT_2_B | Hirshfeld Test Diff for             | C15  | -- C16 .. | 7.2   | su   |
| PLAT416_ALERT_2_B | Short Intra D-H..H-D                | H3A1 | .. H4A .. | 1.74  | Ang. |

### ● Alert level C

ABSTY03\_ALERT\_1\_C The \_exptl\_absorpt\_correction\_type has been given as none.  
However values have been given for Tmin and Tmax. Remove these if an absorption correction has not been applied.  
From the CIF: \_exptl\_absorpt\_correction\_T\_min 0.877  
From the CIF: \_exptl\_absorpt\_correction\_T\_max 0.936

|                   |                                                  |                                  |       |        |        |
|-------------------|--------------------------------------------------|----------------------------------|-------|--------|--------|
| PLAT089_ALERT_3_C | Poor Data / Parameter Ratio (Zmax < 18)          | .....                            | 7.27  | Note   |        |
| PLAT111_ALERT_2_C | ADDSYM Detects (Pseudo) Centre of Symmetry       | ....                             | 95    | %Fit   |        |
| PLAT113_ALERT_2_C | ADDSYM Suggests Possible Pseudo/New Space group. |                                  | P-1   | Check  |        |
| PLAT213_ALERT_2_C | Atom O3A                                         | has ADP max/min Ratio            | ....  | 3.3    | prolat |
| PLAT213_ALERT_2_C | Atom C21A                                        | has ADP max/min Ratio            | ....  | 3.2    | prolat |
| PLAT230_ALERT_2_C | Hirshfeld Test Diff for                          | C15A -- C16A ..                  | 5.2   | su     |        |
| PLAT234_ALERT_4_C | Large Hirshfeld Difference                       | C12A -- C20A ..                  | 0.18  | Ang.   |        |
| PLAT241_ALERT_2_C | High                                             | Ueq as Compared to Neighbors for | ....  | C14    | Check  |
| PLAT241_ALERT_2_C | High                                             | Ueq as Compared to Neighbors for | ....  | C14A   | Check  |
| PLAT242_ALERT_2_C | Low                                              | Ueq as Compared to Neighbors for | ....  | C11    | Check  |
| PLAT242_ALERT_2_C | Low                                              | Ueq as Compared to Neighbors for | ....  | C13    | Check  |
| PLAT242_ALERT_2_C | Low                                              | Ueq as Compared to Neighbors for | ....  | C16    | Check  |
| PLAT242_ALERT_2_C | Low                                              | Ueq as Compared to Neighbors for | ....  | C5A    | Check  |
| PLAT242_ALERT_2_C | Low                                              | Ueq as Compared to Neighbors for | ....  | C11A   | Check  |
| PLAT242_ALERT_2_C | Low                                              | Ueq as Compared to Neighbors for | ....  | C13A   | Check  |
| PLAT242_ALERT_2_C | Low                                              | Ueq as Compared to Neighbors for | ....  | C16A   | Check  |
| PLAT250_ALERT_2_C | Large U3/U1 Ratio for Average U(i,j) Tensor      | ....                             | 2.7   | Note   |        |
| PLAT250_ALERT_2_C | Large U3/U1 Ratio for Average U(i,j) Tensor      | ....                             | 3.0   | Note   |        |
| PLAT340_ALERT_3_C | Low Bond Precision on                            | C-C Bonds                        | ..... | 0.0068 | Ang.   |

### ● Alert level G

|                   |                                                  |       |         |        |
|-------------------|--------------------------------------------------|-------|---------|--------|
| PLAT002_ALERT_2_G | Number of Distance or Angle Restraints on AtSite |       | 4       | Note   |
| PLAT005_ALERT_5_G | No _iucr_refine_instructions_details in the CIF  |       | Please  | Do !   |
| PLAT007_ALERT_5_G | Number of Unrefined Donor-H Atoms                | ..... | 4       | Report |
| PLAT032_ALERT_4_G | Std. Uncertainty on Flack Parameter Value High   | .     | 0.300   | Report |
| PLAT093_ALERT_1_G | No su's on H-positions, refinement reported as   | .     | mixed   |        |
| PLAT154_ALERT_1_G | The su's on the Cell Angles are Equal            | ..... | 0.00100 | Degree |
| PLAT720_ALERT_4_G | Number of Unusual/Non-Standard Labels            | ..... | 1       | Note   |
| PLAT791_ALERT_4_G | The Model has Chirality at C11                   | ..... | R       | Verify |
| PLAT791_ALERT_4_G | The Model has Chirality at C11A                  | ..... | R       | Verify |
| PLAT791_ALERT_4_G | The Model has Chirality at C12                   | ..... | R       | Verify |
| PLAT791_ALERT_4_G | The Model has Chirality at C12A                  | ..... | R       | Verify |
| PLAT860_ALERT_3_G | Number of Least-Squares Restraints               | ..... | 5       | Note   |
| PLAT899_ALERT_4_G | SHELXL97 is Deprecated and Succeeded by SHELXL   |       | 2014    | Note   |

0 **ALERT level A** = Most likely a serious problem - resolve or explain  
3 **ALERT level B** = A potentially serious problem, consider carefully  
20 **ALERT level C** = Check. Ensure it is not caused by an omission or oversight  
13 **ALERT level G** = General information/check it is not something unexpected

3 **ALERT type 1** CIF construction/syntax error, inconsistent or missing data  
19 **ALERT type 2** Indicator that the structure model may be wrong or deficient  
4 **ALERT type 3** Indicator that the structure quality may be low  
8 **ALERT type 4** Improvement, methodology, query or suggestion  
2 **ALERT type 5** Informative message, check



It is advisable to attempt to resolve as many as possible of the alerts in all categories. Often the minor alerts point to easily fixed oversights, errors and omissions in your CIF or refinement strategy, so attention to these fine details can be worthwhile. In order to resolve some of the more serious problems it may be necessary to carry out additional measurements or structure refinements. However, the purpose of your study may justify the reported deviations and the more serious of these should normally be commented upon in the discussion or experimental section of a paper or in the "special\_details" fields of the CIF. checkCIF was carefully designed to identify outliers and unusual parameters, but every test has its limitations and alerts that are not important in a particular case may appear. Conversely, the absence of alerts does not guarantee there are no aspects of the results needing attention. It is up to the individual to critically assess their own results and, if necessary, seek expert advice.

### **Publication of your CIF in IUCr journals**

A basic structural check has been run on your CIF. These basic checks will be run on all CIFs submitted for publication in IUCr journals (*Acta Crystallographica*, *Journal of Applied Crystallography*, *Journal of Synchrotron Radiation*); however, if you intend to submit to *Acta Crystallographica Section C* or *E*, you should make sure that full publication checks are run on the final version of your CIF prior to submission.

### **Publication of your CIF in other journals**

Please refer to the *Notes for Authors* of the relevant journal for any special instructions relating to CIF submission.

---

**PLATON version of 20/08/2014; check.def file version of 18/08/2014**

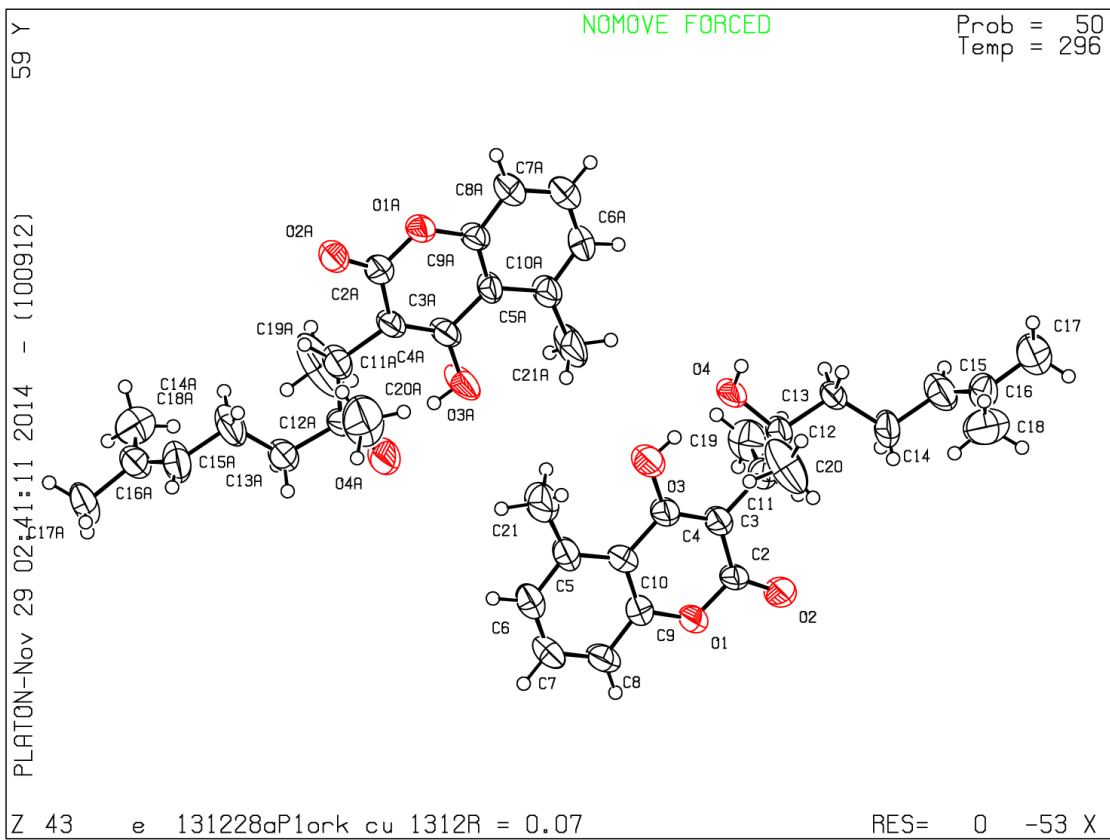

## checkCIF/PLATON report

You have not supplied any structure factors. As a result the full set of tests cannot be run.

THIS REPORT IS FOR GUIDANCE ONLY. IF USED AS PART OF A REVIEW PROCEDURE FOR PUBLICATION, IT SHOULD NOT REPLACE THE EXPERTISE OF AN EXPERIENCED CRYSTALLOGRAPHIC REFEREE.

No syntax errors found.      CIF dictionary      Interpreting this report

### Datablock: g\_\_140323e\_work\_cu\_140323e\_0m

---

Bond precision:    C-C = 0.0017 A                      Wavelength=1.54178

Cell:                      a=5.6562(1)              b=13.7286(2)              c=21.7344(4)  
                                    alpha=90              beta=91.225(1)              gamma=90

Temperature:              298 K

|                | Calculated  | Reported    |
|----------------|-------------|-------------|
| Volume         | 1687.33(5)  | 1687.33(5)  |
| Space group    | P 21/c      | P2(1)/c     |
| Hall group     | -P 2ybc     | ?           |
| Moiety formula | C20 H22 O5  | ?           |
| Sum formula    | C20 H22 O5  | C20 H22 O5  |
| Mr             | 342.38      | 342.38      |
| Dx,g cm-3      | 1.348       | 1.348       |
| Z              | 4           | 4           |
| Mu (mm-1)      | 0.790       | 0.790       |
| F000           | 728.0       | 728.0       |
| F000'          | 730.35      |             |
| h,k,lmax       | 6,16,26     | 6,16,26     |
| Nref           | 3260        | 3173        |
| Tmin,Tmax      | 0.789,0.854 | 0.798,0.858 |
| Tmin'          | 0.789       |             |

Correction method= NONE

Data completeness= 0.973                      Theta(max)= 71.130

R(reflections)= 0.0352( 3095)              wR2(reflections)= 0.0954( 3173)

S = 1.044                      Npar= 233

---

The following ALERTS were generated. Each ALERT has the format  
**test-name\_ALERT\_alert-type\_alert-level.**  
Click on the hyperlinks for more details of the test.

---

### ● Alert level C

ABSTY03\_ALERT\_1\_C The \_exptl\_absorpt\_correction\_type has been given as none.  
However values have been given for Tmin and Tmax. Remove  
these if an absorption correction has not been applied.  
From the CIF: \_exptl\_absorpt\_correction\_T\_min 0.798  
From the CIF: \_exptl\_absorpt\_correction\_T\_max 0.858  
PLAT029\_ALERT\_3\_C \_diffn\_measured\_fraction\_theta\_full Low ..... 0.973 Note  
PLAT413\_ALERT\_2\_C Short Inter XH3 .. XHn H11A .. H11A .. 2.10 Ang.

---

### ● Alert level G

PLAT005\_ALERT\_5\_G No \_iucr\_refine\_instructions\_details in the CIF Please Do !  
PLAT007\_ALERT\_5\_G Number of Unrefined Donor-H Atoms ..... 2 Report  
PLAT093\_ALERT\_1\_G No su's on H-positions, refinement reported as . mixed  
PLAT793\_ALERT\_4\_G The Model has Chirality at C13 ..... S Verify  
PLAT793\_ALERT\_4\_G The Model has Chirality at C14 ..... S Verify  
PLAT899\_ALERT\_4\_G SHELXL97 is Deprecated and Succeeded by SHELXL 2014 Note

---

0 **ALERT level A** = Most likely a serious problem - resolve or explain  
0 **ALERT level B** = A potentially serious problem, consider carefully  
3 **ALERT level C** = Check. Ensure it is not caused by an omission or oversight  
6 **ALERT level G** = General information/check it is not something unexpected

2 ALERT type 1 CIF construction/syntax error, inconsistent or missing data  
1 ALERT type 2 Indicator that the structure model may be wrong or deficient  
1 ALERT type 3 Indicator that the structure quality may be low  
3 ALERT type 4 Improvement, methodology, query or suggestion  
2 ALERT type 5 Informative message, check

---

It is advisable to attempt to resolve as many as possible of the alerts in all categories. Often the minor alerts point to easily fixed oversights, errors and omissions in your CIF or refinement strategy, so attention to these fine details can be worthwhile. In order to resolve some of the more serious problems it may be necessary to carry out additional measurements or structure refinements. However, the purpose of your study may justify the reported deviations and the more serious of these should normally be commented upon in the discussion or experimental section of a paper or in the "special\_details" fields of the CIF. checkCIF was carefully designed to identify outliers and unusual parameters, but every test has its limitations and alerts that are not important in a particular case may appear. Conversely, the absence of alerts does not guarantee there are no aspects of the results needing attention. It is up to the individual to critically assess their own results and, if necessary, seek expert advice.

### Publication of your CIF in IUCr journals

A basic structural check has been run on your CIF. These basic checks will be run on all CIFs submitted for publication in IUCr journals (*Acta Crystallographica*, *Journal of Applied Crystallography*, *Journal of Synchrotron Radiation*); however, if you intend to submit to *Acta Crystallographica Section C* or *E*, you should make sure that full publication checks are run on the final version of your CIF prior to submission.

### Publication of your CIF in other journals

Please refer to the *Notes for Authors* of the relevant journal for any special instructions relating to CIF submission.

PLATON version of 20/08/2014; check.def file version of 18/08/2014

Datablock g\_140323e\_work\_cu\_140323e\_0m - ellipsoid plot

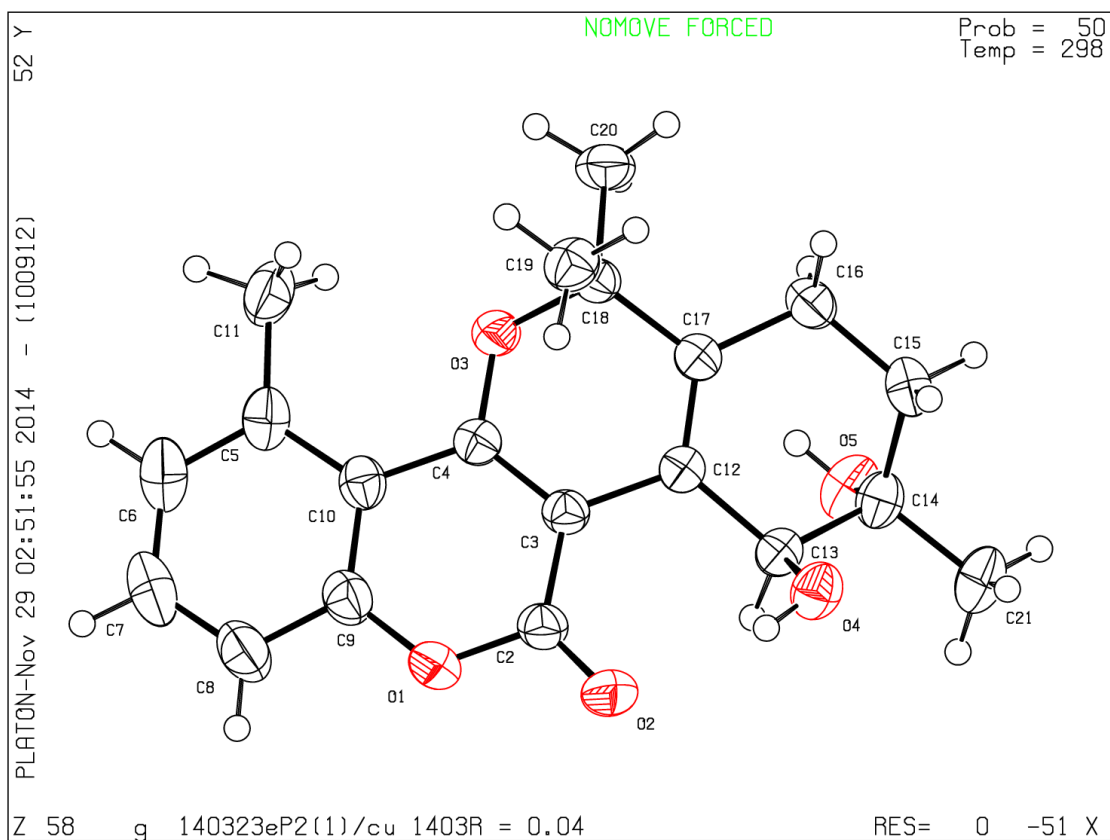

## checkCIF/PLATON report

You have not supplied any structure factors. As a result the full set of tests cannot be run.

THIS REPORT IS FOR GUIDANCE ONLY. IF USED AS PART OF A REVIEW PROCEDURE FOR PUBLICATION, IT SHOULD NOT REPLACE THE EXPERTISE OF AN EXPERIENCED CRYSTALLOGRAPHIC REFEREE.

No syntax errors found.      CIF dictionary      Interpreting this report

### Datablock: cu\_zyh\_ll1331a\_0m

---

Bond precision:    C-C = 0.0021 A                      Wavelength=1.54178

Cell:                      a=13.7242(3)              b=22.2290(5)              c=5.5733(1)  
                                    alpha=90                      beta=90                      gamma=90

Temperature:              100 K

|                | Calculated  | Reported    |
|----------------|-------------|-------------|
| Volume         | 1700.28(6)  | 1700.28(6)  |
| Space group    | P 21 21 2   | P 21 21 2   |
| Hall group     | P 2 2ab     | P 2 2ab     |
| Moiety formula | C20 H22 O5  | C20 H22 O5  |
| Sum formula    | C20 H22 O5  | C20 H22 O5  |
| Mr             | 342.38      | 342.38      |
| Dx,g cm-3      | 1.337       | 1.337       |
| Z              | 4           | 4           |
| Mu (mm-1)      | 0.784       | 0.784       |
| F000           | 728.0       | 728.0       |
| F000'          | 730.35      |             |
| h,k,lmax       | 16,26,6     | 16,26,6     |
| Nref           | 3187[ 1873] | 2998        |
| Tmin,Tmax      | 0.844,0.917 | 0.367,0.919 |
| Tmin'          | 0.285       |             |

Correction method= MULTI-SCAN

Data completeness= 1.60/0.94                      Theta(max)= 69.260

R(reflections)= 0.0376( 2969)                      wR2(reflections)= 0.1153( 2998)

S = 1.112                                              Npar= 232

---

The following ALERTS were generated. Each ALERT has the format  
**test-name\_ALERT\_alert-type\_alert-level.**  
Click on the hyperlinks for more details of the test.

---

## 🟡 Alert level B

CRYSS02\_ALERT\_3\_B The value of \_exptl\_crystal\_size\_max is > 1.0  
Maximum crystal size given = 1.600  
PLAT029\_ALERT\_3\_B \_diffrn\_measured\_fraction\_theta\_full Low ..... 0.954 Note

## 🟢 Alert level G

PLAT005\_ALERT\_5\_G No \_iucr\_refine\_instructions\_details in the CIF Please Do !  
PLAT007\_ALERT\_5\_G Number of Unrefined Donor-H Atoms ..... 2 Report  
PLAT063\_ALERT\_4\_G Crystal Size Likely too Large for Beam Size .... 1.60 mm  
PLAT791\_ALERT\_4\_G The Model has Chirality at C13 ..... S Verify  
PLAT791\_ALERT\_4\_G The Model has Chirality at C14 ..... S Verify  
PLAT899\_ALERT\_4\_G SHELXL97 is Deprecated and Succeeded by SHELXL 2014 Note

---

0 **ALERT level A** = Most likely a serious problem - resolve or explain  
2 **ALERT level B** = A potentially serious problem, consider carefully  
0 **ALERT level C** = Check. Ensure it is not caused by an omission or oversight  
6 **ALERT level G** = General information/check it is not something unexpected

0 ALERT type 1 CIF construction/syntax error, inconsistent or missing data  
0 ALERT type 2 Indicator that the structure model may be wrong or deficient  
2 ALERT type 3 Indicator that the structure quality may be low  
4 ALERT type 4 Improvement, methodology, query or suggestion  
2 ALERT type 5 Informative message, check

---

It is advisable to attempt to resolve as many as possible of the alerts in all categories. Often the minor alerts point to easily fixed oversights, errors and omissions in your CIF or refinement strategy, so attention to these fine details can be worthwhile. In order to resolve some of the more serious problems it may be necessary to carry out additional measurements or structure refinements. However, the purpose of your study may justify the reported deviations and the more serious of these should normally be commented upon in the discussion or experimental section of a paper or in the "special\_details" fields of the CIF. checkCIF was carefully designed to identify outliers and unusual parameters, but every test has its limitations and alerts that are not important in a particular case may appear. Conversely, the absence of alerts does not guarantee there are no aspects of the results needing attention. It is up to the individual to critically assess their own results and, if necessary, seek expert advice.

### Publication of your CIF in IUCr journals

A basic structural check has been run on your CIF. These basic checks will be run on all CIFs submitted for publication in IUCr journals (*Acta Crystallographica*, *Journal of Applied Crystallography*, *Journal of Synchrotron Radiation*); however, if you intend to submit to *Acta Crystallographica Section C* or *E*, you should make sure that full publication checks are run on the final version of your CIF prior to submission.

### Publication of your CIF in other journals

Please refer to the *Notes for Authors* of the relevant journal for any special instructions relating to CIF submission.

PLATON version of 20/08/2014; check.def file version of 18/08/2014

Datablock cu\_zyh\_ll1331a\_0m - ellipsoid plot

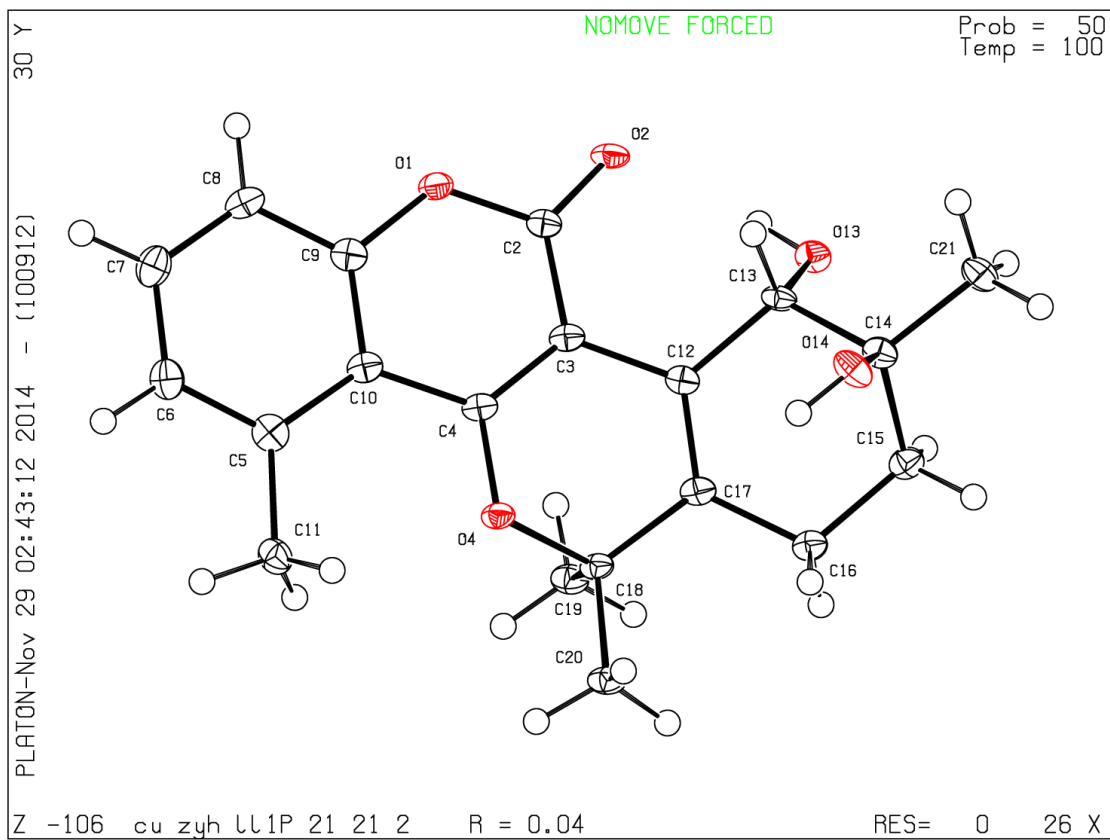



## checkCIF/PLATON report

You have not supplied any structure factors. As a result the full set of tests cannot be run.

THIS REPORT IS FOR GUIDANCE ONLY. IF USED AS PART OF A REVIEW PROCEDURE FOR PUBLICATION, IT SHOULD NOT REPLACE THE EXPERTISE OF AN EXPERIENCED CRYSTALLOGRAPHIC REFEREE.

No syntax errors found.      CIF dictionary      Interpreting this report

### Datablock: e\_\_131227d\_work\_cu\_131227d\_0m

---

Bond precision:    C-C = 0.0019 A                      Wavelength=1.54178

Cell:                      a=5.5649(1)              b=12.7775(3)              c=10.2937(2)  
                                    alpha=90              beta=93.934(1)              gamma=90

Temperature:              296 K

|                | Calculated       | Reported    |
|----------------|------------------|-------------|
| Volume         | 730.21(3)        | 730.21(3)   |
| Space group    | P 21             | P2(1)       |
| Hall group     | P 2yb            | ?           |
| Moiety formula | C15 H16 O6, H2 O | ?           |
| Sum formula    | C15 H18 O7       | C15 H18 O7  |
| Mr             | 310.29           | 310.29      |
| Dx,g cm-3      | 1.411            | 1.411       |
| Z              | 2                | 2           |
| Mu (mm-1)      | 0.955            | 0.955       |
| F000           | 328.0            | 328.0       |
| F000'          | 329.20           |             |
| h,k,lmax       | 6,15,12          | 6,15,12     |
| Nref           | 2830[ 1481]      | 2700        |
| Tmin,Tmax      | 0.892,0.909      | 0.894,0.910 |
| Tmin'          | 0.892            |             |

Correction method= NONE

Data completeness= 1.82/0.95                      Theta(max)= 71.550

R(reflections)= 0.0265( 2695)                      wR2(reflections)= 0.0735( 2700)

S = 1.071                                              Npar= 215

---

The following ALERTS were generated. Each ALERT has the format  
**test-name\_ALERT\_alert-type\_alert-level.**  
Click on the hyperlinks for more details of the test.

---

**Alert level B**

PLAT035\_ALERT\_1\_B No \_chemical\_absolute\_configuration info given . Please Do !

---

**Alert level C**

ABSTY03\_ALERT\_1\_C The \_exptl\_absorpt\_correction\_type has been given as none.

However values have been given for Tmin and Tmax. Remove these if an absorption correction has not been applied.

From the CIF: \_exptl\_absorpt\_correction\_T\_min 0.894

From the CIF: \_exptl\_absorpt\_correction\_T\_max 0.910

PLAT029\_ALERT\_3\_C \_diffrn\_measured\_fraction\_theta\_full Low ..... 0.968 Note

PLAT089\_ALERT\_3\_C Poor Data / Parameter Ratio (Zmax < 18) ..... 6.89 Note

---

**Alert level G**

PLAT002\_ALERT\_2\_G Number of Distance or Angle Restraints on AtSite 7 Note

PLAT005\_ALERT\_5\_G No \_iucr\_refine\_instructions\_details in the CIF Please Do !

PLAT066\_ALERT\_1\_G Predicted and Reported Tmin&Tmax Range Identical ? Check

PLAT720\_ALERT\_4\_G Number of Unusual/Non-Standard Labels ..... 6 Note

PLAT791\_ALERT\_4\_G The Model has Chirality at C2' ..... S Verify

PLAT791\_ALERT\_4\_G The Model has Chirality at C3' ..... R Verify

PLAT860\_ALERT\_3\_G Number of Least-Squares Restraints ..... 5 Note

PLAT899\_ALERT\_4\_G SHELXL97 is Deprecated and Succeeded by SHELXL 2014 Note

---

- 0 **ALERT level A** = Most likely a serious problem - resolve or explain
- 1 **ALERT level B** = A potentially serious problem, consider carefully
- 3 **ALERT level C** = Check. Ensure it is not caused by an omission or oversight
- 8 **ALERT level G** = General information/check it is not something unexpected

- 3 ALERT type 1 CIF construction/syntax error, inconsistent or missing data
  - 1 ALERT type 2 Indicator that the structure model may be wrong or deficient
  - 3 ALERT type 3 Indicator that the structure quality may be low
  - 4 ALERT type 4 Improvement, methodology, query or suggestion
  - 1 ALERT type 5 Informative message, check
-

It is advisable to attempt to resolve as many as possible of the alerts in all categories. Often the minor alerts point to easily fixed oversights, errors and omissions in your CIF or refinement strategy, so attention to these fine details can be worthwhile. In order to resolve some of the more serious problems it may be necessary to carry out additional measurements or structure refinements. However, the purpose of your study may justify the reported deviations and the more serious of these should normally be commented upon in the discussion or experimental section of a paper or in the "special\_details" fields of the CIF. checkCIF was carefully designed to identify outliers and unusual parameters, but every test has its limitations and alerts that are not important in a particular case may appear. Conversely, the absence of alerts does not guarantee there are no aspects of the results needing attention. It is up to the individual to critically assess their own results and, if necessary, seek expert advice.

### **Publication of your CIF in IUCr journals**

A basic structural check has been run on your CIF. These basic checks will be run on all CIFs submitted for publication in IUCr journals (*Acta Crystallographica*, *Journal of Applied Crystallography*, *Journal of Synchrotron Radiation*); however, if you intend to submit to *Acta Crystallographica Section C* or *E*, you should make sure that full publication checks are run on the final version of your CIF prior to submission.

### **Publication of your CIF in other journals**

Please refer to the *Notes for Authors* of the relevant journal for any special instructions relating to CIF submission.

---

**PLATON version of 20/08/2014; check.def file version of 18/08/2014**

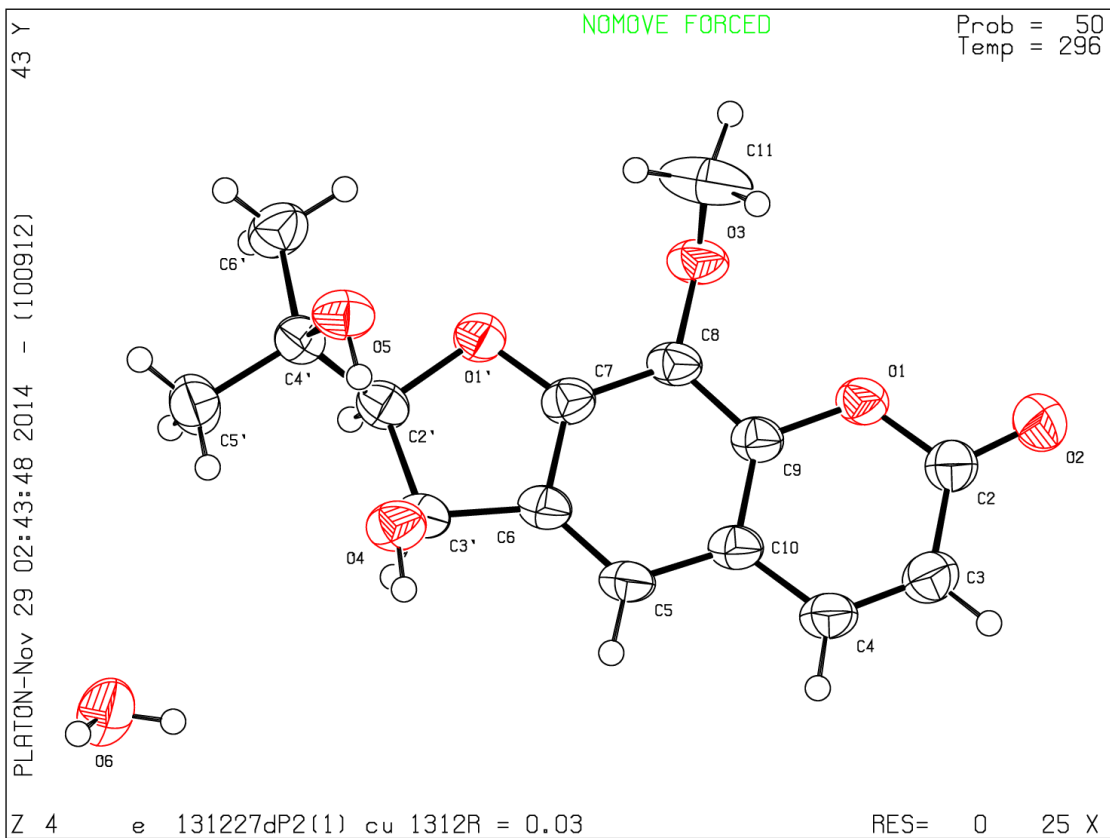

## checkCIF/PLATON report

You have not supplied any structure factors. As a result the full set of tests cannot be run.

THIS REPORT IS FOR GUIDANCE ONLY. IF USED AS PART OF A REVIEW PROCEDURE FOR PUBLICATION, IT SHOULD NOT REPLACE THE EXPERTISE OF AN EXPERIENCED CRYSTALLOGRAPHIC REFEREE.

No syntax errors found.      CIF dictionary      Interpreting this report

### Datablock: e\_\_131205d\_work\_cu\_131205d\_0m

---

Bond precision:    C-C = 0.0019 A                      Wavelength=1.54178

Cell:                      a=5.7224(1)              b=13.8219(3)              c=7.8652(2)  
                            alpha=90              beta=100.508(1)              gamma=90

Temperature:              298 K

|                | Calculated  | Reported    |
|----------------|-------------|-------------|
| Volume         | 611.66(2)   | 611.66(2)   |
| Space group    | P 21        | P2(1)       |
| Hall group     | P 2yb       | ?           |
| Moiety formula | C14 H14 O4  | ?           |
| Sum formula    | C14 H14 O4  | C14 H14 O4  |
| Mr             | 246.25      | 246.25      |
| Dx,g cm-3      | 1.337       | 1.337       |
| Z              | 2           | 2           |
| Mu (mm-1)      | 0.812       | 0.812       |
| F000           | 260.0       | 260.0       |
| F000'          | 260.87      |             |
| h,k,lmax       | 7,16,9      | 6,16,9      |
| Nref           | 2361[ 1232] | 2265        |
| Tmin,Tmax      | 0.823,0.850 | 0.793,0.854 |
| Tmin'          | 0.784       |             |

Correction method= NONE

Data completeness= 1.84/0.96                      Theta(max)= 71.230

R(reflections)= 0.0290( 2258)                      wR2(reflections)= 0.0809( 2265)

S = 1.051                                              Npar= 167

---

The following ALERTS were generated. Each ALERT has the format  
**test-name\_ALERT\_alert-type\_alert-level.**  
Click on the hyperlinks for more details of the test.

---

**Alert level B**

PLAT035\_ALERT\_1\_B No \_chemical\_absolute\_configuration info given . Please Do !

---

**Alert level C**

ABSTY03\_ALERT\_1\_C The \_exptl\_absorpt\_correction\_type has been given as none.

However values have been given for Tmin and Tmax. Remove these if an absorption correction has not been applied.

From the CIF: \_exptl\_absorpt\_correction\_T\_min 0.793

From the CIF: \_exptl\_absorpt\_correction\_T\_max 0.854

PLAT029\_ALERT\_3\_C \_diffrn\_measured\_fraction\_theta\_full Low ..... 0.966 Note

PLAT089\_ALERT\_3\_C Poor Data / Parameter Ratio (Zmax < 18) ..... 7.38 Note

---

**Alert level G**

PLAT005\_ALERT\_5\_G No \_iucr\_refine\_instructions\_details in the CIF Please Do !

PLAT007\_ALERT\_5\_G Number of Unrefined Donor-H Atoms ..... 1 Report

PLAT093\_ALERT\_1\_G No su's on H-positions, refinement reported as . mixed

PLAT720\_ALERT\_4\_G Number of Unusual/Non-Standard Labels ..... 8 Note

PLAT791\_ALERT\_4\_G The Model has Chirality at C2' ..... S Verify

PLAT899\_ALERT\_4\_G SHELXL97 is Deprecated and Succeeded by SHELXL 2014 Note

---

- 0 **ALERT level A** = Most likely a serious problem - resolve or explain
- 1 **ALERT level B** = A potentially serious problem, consider carefully
- 3 **ALERT level C** = Check. Ensure it is not caused by an omission or oversight
- 6 **ALERT level G** = General information/check it is not something unexpected

- 3 ALERT type 1 CIF construction/syntax error, inconsistent or missing data
  - 0 ALERT type 2 Indicator that the structure model may be wrong or deficient
  - 2 ALERT type 3 Indicator that the structure quality may be low
  - 3 ALERT type 4 Improvement, methodology, query or suggestion
  - 2 ALERT type 5 Informative message, check
- 
-

It is advisable to attempt to resolve as many as possible of the alerts in all categories. Often the minor alerts point to easily fixed oversights, errors and omissions in your CIF or refinement strategy, so attention to these fine details can be worthwhile. In order to resolve some of the more serious problems it may be necessary to carry out additional measurements or structure refinements. However, the purpose of your study may justify the reported deviations and the more serious of these should normally be commented upon in the discussion or experimental section of a paper or in the "special\_details" fields of the CIF. checkCIF was carefully designed to identify outliers and unusual parameters, but every test has its limitations and alerts that are not important in a particular case may appear. Conversely, the absence of alerts does not guarantee there are no aspects of the results needing attention. It is up to the individual to critically assess their own results and, if necessary, seek expert advice.

### **Publication of your CIF in IUCr journals**

A basic structural check has been run on your CIF. These basic checks will be run on all CIFs submitted for publication in IUCr journals (*Acta Crystallographica*, *Journal of Applied Crystallography*, *Journal of Synchrotron Radiation*); however, if you intend to submit to *Acta Crystallographica Section C* or *E*, you should make sure that full publication checks are run on the final version of your CIF prior to submission.

### **Publication of your CIF in other journals**

Please refer to the *Notes for Authors* of the relevant journal for any special instructions relating to CIF submission.

---

**PLATON version of 20/08/2014; check.def file version of 18/08/2014**

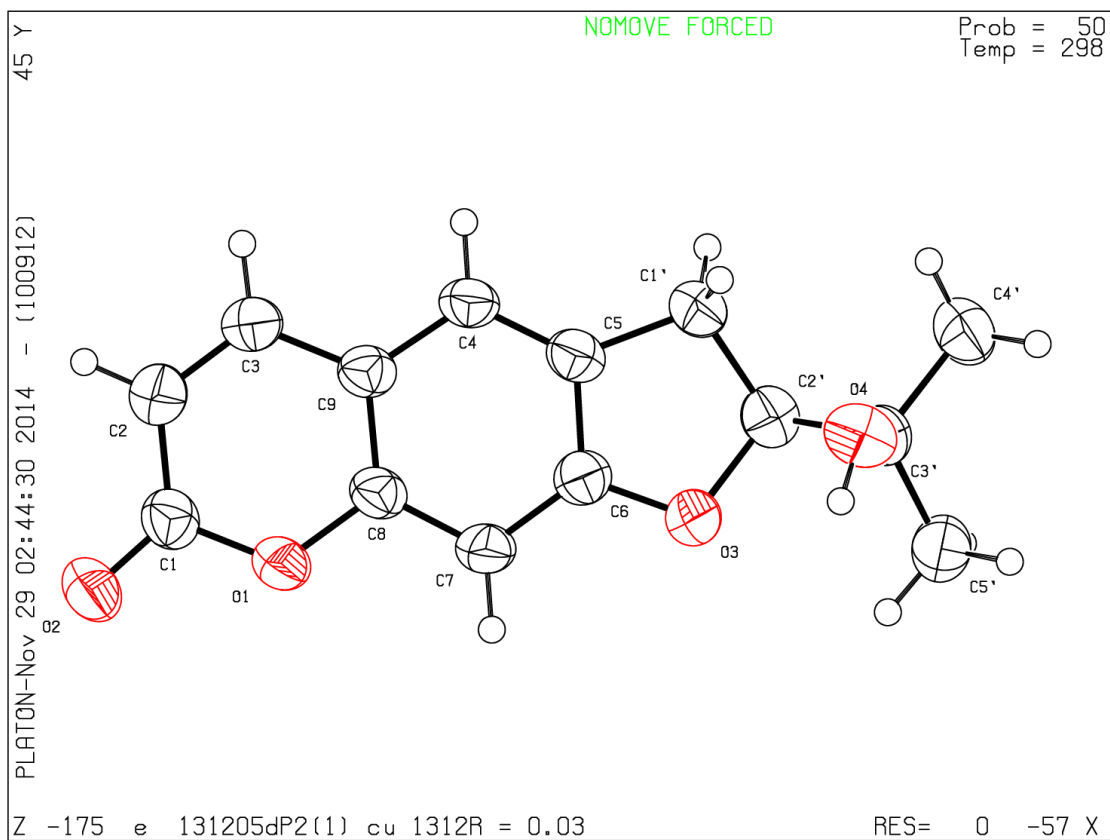



## checkCIF/PLATON report

You have not supplied any structure factors. As a result the full set of tests cannot be run.

THIS REPORT IS FOR GUIDANCE ONLY. IF USED AS PART OF A REVIEW PROCEDURE FOR PUBLICATION, IT SHOULD NOT REPLACE THE EXPERTISE OF AN EXPERIENCED CRYSTALLOGRAPHIC REFEREE.

No syntax errors found.      CIF dictionary      Interpreting this report

### Datablock: t

---

Bond precision:    C-C = 0.0029 A                      Wavelength=0.71073

Cell:                      a=12.883(2)              b=15.779(2)              c=4.8658(8)  
                                    alpha=90                      beta=90                      gamma=90

Temperature:              298 K

|                | Calculated  | Reported    |
|----------------|-------------|-------------|
| Volume         | 989.1(3)    | 989.1(3)    |
| Space group    | P n a 21    | Pna2(1)     |
| Hall group     | P 2c -2n    | ?           |
| Moiety formula | C12 H8 O4   | ?           |
| Sum formula    | C12 H8 O4   | C12 H8 O4   |
| Mr             | 216.18      | 216.18      |
| Dx,g cm-3      | 1.452       | 1.452       |
| Z              | 4           | 4           |
| Mu (mm-1)      | 0.110       | 0.110       |
| F000           | 448.0       | 448.0       |
| F000'          | 448.28      |             |
| h,k,lmax       | 18,22,6     | 18,22,6     |
| Nref           | 2880[ 1598] | 2863        |
| Tmin,Tmax      | 0.984,0.989 | 0.984,0.989 |
| Tmin'          | 0.984       |             |

Correction method= NONE

Data completeness= 1.79/0.99                      Theta(max)= 29.980

R(reflections)= 0.0486( 2074)                      wR2(reflections)= 0.1467( 2863)

S = 1.007                                              Npar= 146

---

The following ALERTS were generated. Each ALERT has the format  
**test-name\_ALERT\_alert-type\_alert-level.**  
Click on the hyperlinks for more details of the test.

---

● **Alert level C**

ABSTY03\_ALERT\_1\_C The \_exptl\_absorpt\_correction\_type has been given as none.  
However values have been given for Tmin and Tmax. Remove  
these if an absorption correction has not been applied.  
From the CIF: \_exptl\_absorpt\_correction\_T\_min 0.984  
From the CIF: \_exptl\_absorpt\_correction\_T\_max 0.989  
STRVA01\_ALERT\_4\_C Flack parameter is too small  
From the CIF: \_refine\_ls\_abs\_structure\_Flack -0.500  
From the CIF: \_refine\_ls\_abs\_structure\_Flack\_su 1.400  
PLAT230\_ALERT\_2\_C Hirshfeld Test Diff for C1' -- C2' .. 5.8 su

---

● **Alert level G**

PLAT005\_ALERT\_5\_G No \_iucr\_refine\_instructions\_details in the CIF Please Do !  
PLAT032\_ALERT\_4\_G Std. Uncertainty on Flack Parameter Value High . 1.400 Report  
PLAT066\_ALERT\_1\_G Predicted and Reported Tmin&Tmax Range Identical ? Check  
PLAT093\_ALERT\_1\_G No su's on H-positions, refinement reported as . mixed  
PLAT899\_ALERT\_4\_G SHELXL97 is Deprecated and Succeeded by SHELXL 2014 Note

- 
- 0 **ALERT level A** = Most likely a serious problem - resolve or explain  
0 **ALERT level B** = A potentially serious problem, consider carefully  
3 **ALERT level C** = Check. Ensure it is not caused by an omission or oversight  
5 **ALERT level G** = General information/check it is not something unexpected
- 3 ALERT type 1 CIF construction/syntax error, inconsistent or missing data  
1 ALERT type 2 Indicator that the structure model may be wrong or deficient  
0 ALERT type 3 Indicator that the structure quality may be low  
3 ALERT type 4 Improvement, methodology, query or suggestion  
1 ALERT type 5 Informative message, check
- 
-

It is advisable to attempt to resolve as many as possible of the alerts in all categories. Often the minor alerts point to easily fixed oversights, errors and omissions in your CIF or refinement strategy, so attention to these fine details can be worthwhile. In order to resolve some of the more serious problems it may be necessary to carry out additional measurements or structure refinements. However, the purpose of your study may justify the reported deviations and the more serious of these should normally be commented upon in the discussion or experimental section of a paper or in the "special\_details" fields of the CIF. checkCIF was carefully designed to identify outliers and unusual parameters, but every test has its limitations and alerts that are not important in a particular case may appear. Conversely, the absence of alerts does not guarantee there are no aspects of the results needing attention. It is up to the individual to critically assess their own results and, if necessary, seek expert advice.

### **Publication of your CIF in IUCr journals**

A basic structural check has been run on your CIF. These basic checks will be run on all CIFs submitted for publication in IUCr journals (*Acta Crystallographica*, *Journal of Applied Crystallography*, *Journal of Synchrotron Radiation*); however, if you intend to submit to *Acta Crystallographica Section C* or *E*, you should make sure that full publication checks are run on the final version of your CIF prior to submission.

### **Publication of your CIF in other journals**

Please refer to the *Notes for Authors* of the relevant journal for any special instructions relating to CIF submission.

---

**PLATON version of 20/08/2014; check.def file version of 18/08/2014**

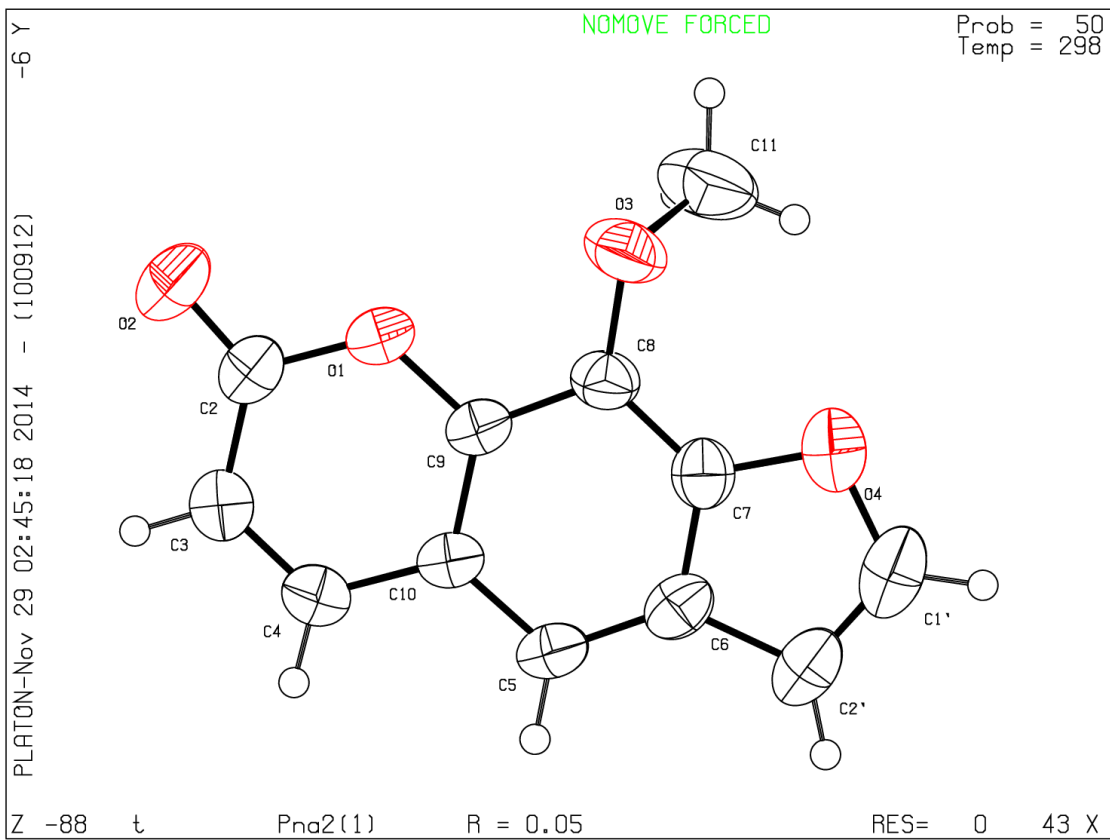

Supplement: srep13544-s1.pdf [file srep13544-s1.pdf]
